# Supplementary material for: Direct translation of incoming retroviral genomes
Source: Nat Commun. 2024 Jan 5;15:299. doi: 10.1038/s41467-023-44501-7 (PMC10770327; doi:10.1038/s41467-023-44501-7)
Supplement: Supplementary file 4 — Source Data [file 41467_2023_44501_MOESM4_ESM.xlsx]

## Sheet: Fig1
	Fig 1b
	I	pLVX-Nluc
	II	pLVX-DD-Nluc
	III	pLVX-Nluc-ΔCIN
	IV	pLVX-DD-Nluc-ΔCIN
	No drug								Ave	StDev
	I	909835	640293	453618	258370	715795	83654	100873	451777	319144
	II	21530	4271	21664	35293	3702	1764	2160	12912	13236
	III	39268	20896	47813	44117	48552	23859	7417	33131.7	15856.6
	IV	1471	427	261	1387	707	105	59	631	586.698
	Shield1								Ave	StDev
	I	2000112	1778695	1097405	2000037	238450	134969	163174	1208278	877527
	II	725412	758106	847828	123207	223974	260205	44790	426217	337438
	III	33212	168537	62632	176559	28086	16573	60093	80933.2	66756.1
	IV	69803	51439	69152	10046	9970	3906	1736	30864.6	31226.8
	Fig 1c
	Shield1 (μM)	I						Ave	StDev
	3	1097405	2000139	238450	1756184	2000139	1778695	1478502	692011
	1	1113693	643732	1735905	1094839	1273040	1064753	1154327	353906
	0.33	1436812	1825128	699747	621818	437379	1999158	1170007	670263
	0.11	1338001	1515349	948439	583972	973062	1299498	1.10972e+06	338751
	0.037	1998381	1568819	2000138	653007	2000122	377487	1.43299e+06	735374
	0.012	1632576	1694352	2000139	1153208	494491	1110041	1.34747e+06	538381
	0.004	284455	2000139	227780	550865	508017	877954	741535	658247
	Shield1 (μM)	II						Ave	StDev
	3	123207	223974	260205	725412	758106	847828	489789	320454
	1	344732	364922	426364	386922	201739	369615	349049	77208.5
	0.33	35080	241427	194204	89257	65629	320156	157626	112189
	0.11	93485	54735	220401	84650	17163	27559	82998.8	73754.8
	0.037	22531	13964	58938	61110	103447	15090	45846.7	35293.8
	0.012	25192	19675	34230	8695	14360	23995	21024.5	8931.19
	0.004	17666	9721	10072	11204	13699	7829	11698.5	3503.9
	Shield1 (μM)	III						Ave	StDev
	3	176559	4449	28086	33212	168537	62632	78912.5	74898.8
	1	20128	31480	44309	71973	249191	118815	89316	85893.7
	0.33	20622	10993	370123	75551	249963	34453	126951	148469
	0.11	50090	24794	69558	358973	45401	98303	107853	125503
	0.037	19203	24125	35471	207114	63357	92195	73577.5	70904.6
	0.012	61639	30605	21334	72902	166587	100447	75585.7	53042.5
	0.004	30269	24497	75351	187455	50311	63811	71949	59793.9
	0	44117	48552	23859	39268	20896	47813	37417.5	12142
	Shield1 (μM)	IV						Ave	StDev
	3	10046	9970	3906	69803	51439	69152	35719.3	31179.4
	1	8579	11486	18064	79414	41390	22235	30194.7	26741.9
	0.33	18805	1228	3927	12999	13362	12909	10538.3	6608.75
	0.11	8027	1291	2236	3967	15569	4525	5935.83	5259.29
	0.037	871	234	6093	2140	2965	1214	2252.83	2113.34
	0.012	585	670	379	1439	3125		1239.6	1127.84
	0.004	1508	538	272	986	2170	1034	1084.67	682.456
	Fig 1d
	Dilution	I (VSV-G)			Average	St. Dev.		Dilution	II (VSV-G)			Average	St. Dev.
	1	2000140	2000140	2000139	2.00014e+06	0.57735		1	20467	23142	12256	18621.7	5672.76
	0.2	914067	928247	684956	842423	136555		0.2	5375	4850	2545	4256.67	1505.41
	0.04	198818	201257	147149	182408	30559.5		0.04	1291	1203	604	1032.67	373.835
	0.008	40103	42775	37089	39989	2844.71		0.008	475	407	245	375.667	118.158
	0.0016	8479	8933	7496	8302.67	734.549		0.0016	241	216	165	207.333	38.7341
	0.00032	2068	2490	2511	2356.33	249.925		0.00032	135	103	161	133	29.0517
	Dilution	I (ΔEnv)			Average	St. Dev.		Dilution	II (ΔEnv)			Average	St. Dev.
	1	2000140	2000140	2000138	2.00014e+06	1.1547		1	30543	33342	17426	27103.7	8497.15
	0.2	1287712	1283428	642507	1.07122e+06	371279		0.2	7640	7017	3755	6137.33	2086.54
	0.04	223809	248916	140512	204412	56745.3		0.04	1546	1580	843	1323	416.04
	0.008	48821	56134	44478	49811	5890.73		0.008	553	522	375	483.333	95.0912
	0.0016	10026	11708	12733	11489	1366.72		0.0016	275	219	178	224	48.6929
	0.00032	2241	2722	4099	3020.67	964.335		0.00032	168	127	176	157	26.2869
	Dilution	III (VSV-G)			Average	St. Dev.		Dilution	IV (VSV-G)			Average	St. Dev.
	1	1211693	1182781	2197112	1.53053e+06	577459		1	3482	3274	10380	5712	4043.94
	0.2	277142	283458	650752	403784	213904		0.2	737	708	3666	1703.67	1699.49
	0.04	52410	57490	156614	88838	58750.7		0.04	150	168	934	417.333	447.537
	0.008	10978	12347	18338	13887.7	3914.41		0.008	56	54	216	108.667	92.9588
	0.0016	2200	2965	4010	3058.33	908.602		0.0016	24	21	110	51.6667	50.5404
	0.00032	519	652	2696	1289	1220.31		0.00032	11	9	128	49.3333	68.1347
	Dilution	III (ΔEnv)			Average	St. Dev.		Dilution	IV (ΔEnv)			Average	St. Dev.
	1	925458	940686	2191552	1.35257e+06	726624		1	4188	4306	16110	8201.33	6849.36
	0.2	258082	232798	619766	370215	216487		0.2	928	1043	8556	3509	4371.21
	0.04	50035	56487	149578	85366.7	55702.1		0.04	184	190	2138	837.333	1126.41
	0.008	11021	11681	18368	13690	4064.68		0.008	145	162	428	245	158.71
	0.0016	2120	2901	3768	2929.67	824.374		0.0016	66	74	146	95.3333	44.0606
	0.00032	442	629	3142	1404.33	1507.77		0.00032	15	19	150	61.3333	76.8136
	Fig 1e
	I & II
	Time (h)	Nluc VSVG		Average	Nluc ΔEnv		Average	Nluc NVP		Average
	2	118025	79974	98999.5	66238	38532	52385	43990	101863	72926.5
	4	58300	38907	48603.5	44262	26507	35384.5	62014	49318	55666
	6	74446	60216	67331	40089	33443	36766	45096	54781	49938.5
	8	69193	47754	58473.5	44677	30646	37661.5	55455	41980	48717.5
	10	122372	46476	84424	78090	32876	55483	74282	58188	66235
	12	94201	187750	140976	61421	151747	106584	53177	46951	50064
	Time (h)	DDNluc VSVG		Average	DDNluc ΔEnv		Average	DDNluc NVP		Average
	2	343	310	326.5	433	371	402	205	436	320.5
	4	351	318	334.5	369	348	358.5	206	246	226
	6	327	327	327	294	337	315.5	260	277	268.5
	8	288	288	288	336	268	302	257	201	229
	10	306	207	256.5	543	224	383.5	392	233	312.5
	12	378	610	494	422	746	584	187	205	196
	III & IV
	Time (h)	Nluc VSVG		Average	Nluc ΔEnv		Average	Nluc NVP		Average
	2	240204	153369	196786	147022	120737	133880	107193	214632	160912
	4	199340	88772	144056	190660	94097	142378	146701	90452	118576
	6	140184	195260	167722	100879	104789	102834	130520	141841	136180
	8	139753	105581	122667	77075	61814	69444.5	166876	102074	134475
	10	485502	113312	299407	531951	81196	306574	418153	164644	291398
	12	364180	427994	396087	239823	510375	375099	112062	113439	112750
	Time (h)	DDNluc VSVG		Average	DDNluc ΔEnv		Average	DDNluc NVP		Average
	2	392	845	618.5	546	1194	870	672	972	822
	4	1110	879	994.5	1756	1110	1433	853	708	780.5
	6	890	833	861.5	1355	1269	1312	751	463	607
	8	747	582	664.5	1027	865	946	774	594	684
	10	1206	432	819	1721	538	1129.5	759	569	664
	12	900	999	949.5	1197	1987	1592	451	475	463
	Fig 1f
			VSVG		Average	ΔEnv		Average	NVP		Average
	t=20h	Nluc	19708	25062	22385	13822	12353	13087.5	19230	23345	21287.5
		DD-Nluc	205	183	194	92	93	92.5	69	80	74.5
	t=72h	Nluc	695455	671959	683707	18220	6009	12114.5	22606	14752	18679
		DD-Nluc	1358	2755	2056.5	96	56	76	57	81	69

## Sheet: Fig2
	Fig 2b
		No drug			Ave	StDev
	Nluc	168703	181031	173076	174270	6250.13
	DD-Nluc	1507	1261	1074	1280.67	217.169
		Shield1			Ave	StDev
	Nluc	161622	180063	147889	163191	16144.3
	DD-Nluc	222603	271478	201808	231963	35765.7
	Fig 2c
	ng p24	No CHX							Ave	StDev
	120.16	762583	731639	716226	1300607	1366783	627497	674399	882819	311572
	40.0533	807156	590748	425248	903885	1140159	435725	562195	695017	265479
	13.3511	447296	316714	219999	423063	592284	203996	291527	356411	139022
	4.45037	243960	212749	172744	169870	250323	81833	122849	179190	62132.1
	1.48346	92429	87549	56091	67354	104531	32378	51705	70291	25669.1
	0.494486	31558	28780	18839	24257	36030	11984	17714	24166	8515.67
	0.164829	10259	9320	3964	10641	10023	5015	4876	7728.29	2953.95
	0.054943	868	837	1131	3923	4493	1977	2376	2229.29	1476.26
	0.018314	235	201	271	1640	1617	813	882	808.429	624.146
	0.006105	69	94	134	586	662	282	323	307.143	236.886
	0.002035	82	59	65	356	225	180	143	158.571	106.947
	0.000678	70	54	58	328	543	142	264	208.429	182.289
	ng p24	CHX							Ave	StDev
	120.16	54736	60435	62024	109187	113188	54893	56974	73062.4	26208
	40.0533	23913	20508	20005	46947	47292	23172	24437	29467.7	12171.3
	13.3511	9823	8181	8378	17004	17706	8198	9147	11205.3	4246.87
	4.45037	3818	3202	2854	6099	5937	2980	2955	3977.86	1430.04
	1.48346	2569	1170	1130	1977	1690	992	907	1490.71	613.908
	0.494486	521	464	471	1007	761	431	367	574.571	227.769
	0.164829	214	176	196	292	265	142	114	199.857	63.5569
	0.054943	64	60	93	170	127	96	61	95.8571	40.8062
	0.018314	66	53	78	56	72	57	46	61.1429	11.2905
	0.006105	32	38	107	80	54	37	45	56.1429	27.5767
	0.002035	37	30	80	89	74	48	25	54.7143	25.9468
	0.000678	24	33	56	185	46	85	37	66.5714	55.8476
	Fig 2d
	Time (h)	Untreated (UT)						Ave	StDev		CHX						Ave	StDev
	1	34703.3	33979.6	39790.3	5784	4950	4255	20577	17191.7		40340.7	37858.5	41500.8	3099	3083	3554	21572.7	20111.8
	2	36869.1	42045.1	46521.6	16777	19196	20501	30318.3	13011		29300.5	19064.4	19933.9	8196	7017	7942	15242.3	8998.36
	3	78149.4	95283.6	77323.8	34464	34822	15716	55959.8	31697.3		27467.6	25029.5	18028.6	3635	5808	4756	14120.8	10762.5
	4	73093.1	62107.1	78439.1	45664	50949	49574	59971.1	13505.6		22350.1	20105.3	22235	6941	9611	5445	14447.9	7948.47
	6	129345	117647	123422	105123	85899	99537	110162	16289.9		28610.8	20305.7	26296.7	7542	10517	9279	17091.9	9200.14
	8	154499	165910	182116	133668	121715	150830	151456	21723.3		32465.3	27653.5	25479.7	10251	10228	10656	19455.6	10198.6
	Time (h)	NVP						Ave	StDev		NVP+CHX						Ave	StDev
	1	32893.2	46546.5	46428.2	3833	4381	3401	22913.8	21444.4		77448.4	38867.9	36176	3058	5267	5215	27672	29283.1
	2	20757.3	62442.6	61161.9	10540	13250	17432	30930.6	24170.3		27563.3	23134.1	35060.9	3835	4519	7250	16893.7	13412.6
	3	25096.2	68010.1	75394.8	21513	24349	24739	39850.3	24815.2		33265.3	21178.6	24327.7	5411	4532	4742	15576.1	12357.7
	4	28952.4	59942.1	150682	46163	39476	37902	60519.6	45357.8		18311.3	25136.1	25772.4	5750	6159	5874	14500.5	9749.48
	6	11340.2	101240	200013	89464	92989	105539	100098	60092.5		29322.1	21635.2	26753	8157	7792	7764	16903.9	10165.4
	8	5720.5	63417.9	180053	115601	119004	140175	103995	61250.5		21646.9	27013.6	32435.8	6897	7083	9269	17390.9	11130.1
	Fig 2e
	Time (h)	Untreated (UT)						Ave	StDev		CHX						Ave	StDev
	1	1166.2	1702.1	1289.1	284	386	355	863.733	599.735		1159.1	787.6	1030.9	183	156	147	577.267	470.445
	2	4597.8	13605.6	12000.3	5855	6897	5794	8124.95	3730.7		1660.3	1707.5	1179.8	351	343	269	918.433	680.613
	3	4833.9	18449.7	14505.7	7925	9179	11185	11013.1	4870.6		1871	1942.2	1583.4	638	616	402	1175.43	698.309
	4	4965.1	18082.5	18690.7	8417	11540	9841	11922.7	5457.6		1624	1348.4	1211.9	815	906	681	1097.72	358.662
	6	8296.4	11685.4	9070.5	8401	9494	9369	9386.05	1229.32		2801.7	2591.6	4406.8	1275	1184	955	2202.35	1328.4
	8	3373.4	5645.2	6879.4	3539	6196	5828	5243.5	1448.38		2138.5	1576	1549.3	1628	1532	1516	1656.63	239.311
	Time (h)	Shield1 (S1)						Ave	StDev		S1+CHX						Ave	StDev
	1	612.4	698.7	1251.5	312	79	587	590.1	397.068		799.4	1035.1	507	58	128	120	441.25	408.279
	2	20530.9	30693.4	12714.9	11965	141	12338	14730.5	10185.7		1880.1	1846.6	1134.8	779	688	638	1161.08	571.143
	3	38075.1	62952.6	28630.2	46831	25931	38011	40071.8	13478.3		3908.9	2971.7	2305.9	1575	1085	996	2140.42	1147.98
	4	88249.4	94212.4	34623.8	68080	59306	70496	69161.3	21376.8		7258.9	3894	2824.9	1940	1513	1621	3175.3	2191.81
	6	200009	188628	199981	128038	123242	79089	153165	50314.6		21329.1	14271.3	6510.3	3484	2533	2927	8509.12	7663.89
	8	196407	114299	132394	142273	125725	169530	146771	30678.9		12758.1	12634	6298	4754	4177	3820	7406.85	4183.86
	Fig 2f
	Time (h)	Untreated (UT)			Ave	StDev		CHX			Ave	StDev
	1	160923	181784	156688	166465	13434.6		132805	181173	183536	165838	28631.8
	2	189772	232010	236416	219399	25752.4		121198	149701	154218	141706	17903.2
	3	178141	304174	302691	261669	72340.9		103151	128108	133047	121435	16026.1
	4	212070	387818	329064	309651	89467.9		119474	128222	134349	127348	7475.89
	6	240000	385437	372944	332794	80604.1		118958	115979	132385	122441	8739.9
	8	244325	398114	364415	335618	80837.6		117833	151466	120215	129838	18768.2
	Time (h)	NVP			Ave	StDev		NVP+CHX			Ave	StDev
	1	145238	171296	127212	147915	22163.6		152260	186467	208018	182248	28117.4
	2	159339	246180	206972	204164	43488.6		128711	139273	186083	151356	30534.9
	3	265877	335300	263078	288085	40913.3		134156	132324	127564	131348	3402.65
	4	323479	464603	318360	368814	82995.2		102301	128850	121339	117497	13685.2
	6	420269	484953	439381	448201	33231.8		106418	106606	126791	113272	11708.5
	8	381046	459491	400290	413609	40883.4		107998	130750	104232	114327	14347.1
	Fig 2g
	Time (h)	Untreated (UT)						Ave	StDev		CHX						Ave	StDev
	1	202	1030	534	380	2202	997	890.833	722.851		219	2720	1657	284	5754	1427	2010.17	2057.81
	2	23831	42644	5640	11838	31131	3826	19818.3	15398.4		2459	599	781	1301	329	415	980.667	802.28
	3	43728	76121	6835	30384	55978	5712	36459.7	27809.2		1841	70	530	1993	76	796	884.333	847.85
	4	35213	31067	6905	31142	22940	6713	22330	12666.1		4482	3142	668	2273	4559	412	2589.33	1805.52
	6	22523	8879	3472	15916	8298	2925	10335.5	7589.11		2190	1244	585	1834	901	469	1203.83	690.781
	8	11005	7008	1314	7370	5651	1382	5621.67	3754.74		2413	1375	486	3287	733	686	1496.67	1124.42
	Time (h)	Shield1 (S1)						Ave	StDev		S1+CHX						Ave	StDev
	1	4587	848	2927	1703	1945	1369	2229.83	1345.47		411	1029	182	414	875	261	528.667	343.248
	2	67187	70337	50315	48936	56053	37898	55121	12132.3		1399	254	358	1421	193	267	648.667	592.123
	3	256842	109207	117944	191990	93965	101841	145298	65110.1		3114	2789	255	1932	1881	248	1703.17	1222.14
	4	429237	308942	213414	382363	287387	200966	303718	90495.1		3390	2189	431	3699	2276	420	2067.5	1404.38
	6	633403	631736	285931	548103	561815	235863	482808	176129		4930	1570	591	4172	1392	561	2202.67	1879.71
	8	626587	770535	317251	666764	725552	287491	565697	210028		6541	806	667	7204	866	785	2811.5	3153.28

## Sheet: Fig3
	Fig 3a							Fig 3c
		Untreated	DNase	Benzonase	RNase			No CHX							Ave	StDev
		351370	313508	244498	331029			WT	405640	445416	379141	555530	558901	512678	476218	77214.2
		222159	335587	349318	441336			P127D	2162	2492	2556	5786	4726	4766	3748	1527.09
		23046	306234	305075	470694			ΔEnv	3046	2539	1901	2949	3016	3752	2867.17	613.992
		269377	276409	302031
		248000	384294	526550				CHX
		285152	430524	522034				WT	13015	11338	11665	23540	24133	20739	17405	6050.59
	Ave	233184	341093	374918	414353			P127D	2505	2927	2270	3723	2856	3637	2986.33	588.45
	StDev	111783	56665.1	120408	73638.6			ΔEnv	1333	1899	948	2019	2376	2293	1811.33	561.393
	Fig 3d							Fig 3e
		WT	ΔGag	No virus					No drug	CHX
		156514	84	197					876092	26415
		152842	85	246					450064	47310
		160044	84	167					67877	75646
		179931	100	22					929217	28101
		167075	104	35					482241	49546
		168237	59	71				Ave	561098	45403.6
	Ave	164107	86	123				StDev	352330	19970.9
	StDev	9770.64	15.8619	92.9408
	Fig 3f							Fig 3g
		No drug	ActD	CHX	No virus				No drug	ActD	CHX	Mock
		34090	102279	2625	109				981244	617	205	42
		36912	112463	2628	261				1069417	622	75	57
		35463	83367	2640	81				885924	468	217	58
		70438	359609	4716	27				275039	93		140
		110218	420691	5111	36				312183	3		180
		121031	380460	4968	22				287657	9		151
		195996		4191	59			Ave	635244	302	165.667	104.667
		131819		6504	57			StDev	381050	299.37	78.7485	59.0717
		148389		3920	48
		58823		2672	46
		61663		2245	27
		49063		2424	32
	Ave	87825.4	243145	3720.33	67.0833
	StDev	52622.4	158992	1381.97	66.0392
	Fig 3h
	No CHX							Ave	StDev
	No RTI	180877	170587	165867	146915	130163	1019748	302360	351913
	NVP	330914	384909	391864	175489	265548	134137	280477	108183
	TAF	228438	236127	178621	164226	69690	45696	153800	79792.6
	EFV	212989	526082	465221	144528	151767	33122	255618	195720
	CHX							Ave	StDev
	No RTI	15374	19281	17120	4583	7225	7258	11806.8	6175.54
	NVP	18377	14667	16215	4087	2751	1680	9629.5	7569.57
	TAF	18440	17510	16064	1320	1353	1954	9440.17	8687.65
	EFV	13441	17298	16995	1930	1160	1550	8729	7987.64
	Fig 3i
		No CHX			Ave	StDev
	X-MLV	120239	185008	135823	147023	33805.9
	HIV-1	21188	18754	20318	20086.7	1233.38
	ΔEnv	2206	2872	2617	2565	336.031
		CHX
	X-MLV	3588	7121	5388	5365.67	1766.61
	HIV-1	2086	4183	2207	2825.33	1177.33
	ΔEnv	1724	3916	1398	2346	1369.4
	Fig 3j
	No CHX				Ave	StDev		CHX				Ave	StDev
	Jurkat	1704040	1762640	1778259	1748313	39128.8		Jurkat	119423	64928	58631	80994	33429.1
	THP-1	209569	204506	241662	218579	20150.1		THP-1	16272	12810	12866	13982.7	1982.82
	U937	127553	145069	136414	136345	8758.2		U937	10583	9744	10249	10192	422.394
	C8166	821254	810255	905536	845682	52126.3		C8166	64453	63431	60367	62750.3	2126.34
	PM1	79320	56761	53572	63217.7	14035.9		PM1	7827	6740	7232	7266.33	544.313
	A3.01	68265	63037	53269	61523.7	7611.68		A3.01	8563	7100	7639	7767.33	739.895
	MDM	147863	106975	97423	117420	26793.2		MDM	14386	19935	27186	20502.3	6418.83
	CD4+T	70071	69897	63348	67772	3832.28		CD4+T	30714	34473	46856	37347.7	8446.23

## Sheet: Fig4
	Fig 4b									Fig 4e	n=3
		t=1h					Ave	StDev		Distance	No virus	HIV-1 ΔRT	HIV-1 ΔRT + EDTA
	No drug	271	690	611	350	926	569.6	264.867		8.25	0.129868	0.260004	0.257251
	CHX	458	633	344	633	664	546.4	139.292		8.28	0.115208	0.257926	0.255565
	Shield1	630	544	601	769	728	654.4	92.4462		8.31	0.103109	0.255897	0.253916
	CHX+Shield1	671	679	688	591	781	682	67.5426		8.34	0.094228	0.253894	0.252012
										8.37	0.088694	0.251598	0.2504
		t=2h					Ave	StDev		8.4	0.085155	0.249649	0.248816
	No drug	503	651	553	3152	435	1058.8	1172.78		8.43	0.083535	0.247755	0.247271
	CHX	374	264	179	313	733	372.6	213.727		8.46	0.082639	0.245902	0.245493
	Shield1	1299	1151	1482	3247	5037	2443.2	1679.05		8.49	0.082134	0.243848	0.243994
	CHX+Shield1	360	1105	432	925	855	735.4	323.973		8.52	0.081769	0.242161	0.242475
										8.55	0.081616	0.240547	0.240977
		t=3h					Ave	StDev		8.58	0.082264	0.238928	0.239253
	No drug	1292	2220	1574	4316	3428	2566	1277.93		8.61	0.086186	0.237018	0.237756
	CHX	500	540	619	519	421	519.8	71.4192		8.64	0.097451	0.235408	0.236273
	Shield1	5192	4718	6090	7540	11921	7092.2	2905.59		8.67	0.112535	0.233835	0.234823
	CHX+Shield1	762	780	478	1204	2179	1080.6	666.465		8.7	0.13106	0.232274	0.233187
										8.73	0.151715	0.230466	0.231784
		t=4h					Ave	StDev		8.76	0.177165	0.228938	0.230422
	No drug	484	1076	1240	1945	1973	1343.6	628.307		8.79	0.199133	0.227435	0.229075
	CHX	546	404	317	455	381	420.6	85.8563		8.82	0.220133	0.225977	0.227478
	Shield1	5701	6423	9006	31326	27081	15907.4	12291.6		8.85	0.239477	0.224381	0.226145
	CHX+Shield1	1435	1020	812	1511	1926	1340.8	436.704		8.88	0.259668	0.223104	0.224888
										8.91	0.275438	0.221929	0.223712
		t=6h					Ave	StDev		8.94	0.290357	0.220807	0.222383
	No drug	291	343	318	1148	918	603.6	400.755		8.97	0.304696	0.21948	0.221227
	CHX	244	279	332	469	513	367.4	118.128		9	0.320791	0.218323	0.220102
	Shield1	8810	6345	10593	30344	32408	17700	12596.4		9.03	0.333971	0.217109	0.219027
	CHX+Shield1	1286	949	998	3227	2933	1878.6	1109.14		9.06	0.346586	0.215877	0.217817
										9.09	0.358578	0.214456	0.216808
		t=8h					Ave	StDev		9.12	0.369796	0.213294	0.215849
	No drug	328	284	539	409	492	410.4	107.197		9.15	0.374335	0.212183	0.214914
	CHX	314	296	248	335	293	297.2	32.2134		9.18	0.373083	0.211083	0.213861
	Shield1	8746	14651	7223	28134	31316	18014	11101.9		9.21	0.366869	0.209787	0.213002
	CHX+Shield1	883	692	1187	3401	3217	1876	1321.6		9.24	0.355355	0.208663	0.212177
										9.27	0.343334	0.207575	0.211376
	Fig. 4c	Please see Supplementary Information								9.3	0.330393	0.20651	0.210448
										9.33	0.317705	0.205276	0.209719
	Fig 4d									9.36	0.304721	0.204219	0.209039
										9.39	0.295579	0.203097	0.208302
	Log2 (Heavy / Light Peptide Ratio)									9.42	0.28814	0.201912	0.20741
										9.45	0.281807	0.200538	0.206659
	Mock	Virus	Virus+NVP	Vírus+NVP+CHX						9.48	0.275092	0.199377	0.205942
	nd	-3.08595	-6.13927	nd						9.51	0.269741	0.198263	0.205263
	nd	-3.11276	-5.90673	nd						9.54	0.26478	0.1972	0.204474
	nd	-3.13424	-6.12976	nd						9.57	0.260264	0.195991	0.203798
		-3.11099	-6.05859		Ave					9.6	0.25546	0.194982	0.203128
		0.0241938	0.131601		StDev					9.63	0.251688	0.193989	0.20253
										9.66	0.24819	0.193028	0.201883
		nd = not detected								9.69	0.244886	0.191987	0.201381
										9.72	0.241338	0.191119	0.200888
										9.75	0.238637	0.190311	0.200358
	Fig 4f									9.78	0.236232	0.18956	0.199764
		HIV-1		HPRT-1						9.81	0.23402	0.188744	0.19927
		Virus	Virus+EDTA	Virus	Virus+EDTA					9.84	0.231493	0.188089	0.198784
		11.2842	2.9696	73.29	2.904					9.87	0.229244	0.187491	0.198316
		8.85001	2.08204	71.261	0.435					9.9	0.226925	0.186954	0.197795
		11.3344	0.018957	76.279	2.278					9.93	0.226528	0.186382	0.197416
		9.96351	0.105193	68.477	0.66					9.96	0.224545	0.185883	0.197072
	Ave	10.358	1.29395	72.3268	1.56925					9.99	0.221744	0.185401	0.196729
	StDev	1.02966	1.27158	2.85064	1.04847					10.02	0.219338	0.184917	0.196351
										10.05	0.217009	0.184338	0.196068
										10.08	0.214721	0.183881	0.195848
										10.11	0.212131	0.183404	0.195658
										10.14	0.209944	0.182885	0.195492
										10.17	0.207857	0.182328	0.195361
										10.2	0.205884	0.181834	0.195269
										10.23	0.203757	0.181372	0.195191
										10.26	0.202041	0.180927	0.195164
										10.29	0.200416	0.18038	0.195167
										10.32	0.198894	0.179873	0.195218
										10.35	0.197312	0.179363	0.195271
										10.38	0.19609	0.178808	0.19537
										10.41	0.194931	0.178151	0.195505
										10.44	0.193851	0.177597	0.195643
										10.47	0.192686	0.177045	0.195834
										10.5	0.191755	0.176446	0.196072
										10.53	0.190906	0.175743	0.196321
										10.56	0.190189	0.175212	0.196556
										10.59	0.189507	0.174713	0.196857
										10.62	0.189003	0.174253	0.197236
										10.65	0.188592	0.173739	0.197546
										10.68	0.188263	0.173334	0.197876
										10.71	0.187851	0.172875	0.198244
										10.74	0.187438	0.172494	0.198709
										10.77	0.187009	0.17205	0.199161
										10.8	0.186579	0.171683	0.199587
										10.83	0.186154	0.171353	0.200093
										10.86	0.185783	0.171019	0.200757
										10.89	0.185385	0.170675	0.201386
										10.92	0.184958	0.170363	0.202085
										10.95	0.18455	0.170052	0.20281
										10.98	0.184163	0.169773	0.203683
										11.01	0.183772	0.169461	0.204515
										11.04	0.183374	0.169214	0.205442
										11.07	0.1829	0.168959	0.206424
										11.1	0.182472	0.168691	0.207615
										11.13	0.182023	0.168385	0.20872
										11.16	0.181556	0.168159	0.209858
										11.19	0.181029	0.167948	0.211076
										11.22	0.180531	0.167736	0.212563
										11.25	0.180069	0.167454	0.213892
										11.28	0.179659	0.167246	0.215277
										11.31	0.179183	0.167056	0.216686
										11.34	0.178774	0.166866	0.21842
										11.37	0.178321	0.166684	0.219971
										11.4	0.177873	0.166561	0.22156
										11.43	0.177375	0.166428	0.223201
										11.46	0.176891	0.166311	0.225171
										11.49	0.176451	0.166184	0.226913
										11.52	0.176061	0.166086	0.228695
										11.55	0.175663	0.166021	0.230506
										11.58	0.175346	0.165949	0.232649
										11.61	0.175024	0.165847	0.23453
										11.64	0.174663	0.165765	0.236445
										11.67	0.174226	0.165726	0.238229
										11.7	0.173892	0.165702	0.240736
										11.73	0.173585	0.165645	0.242758
										11.76	0.173325	0.165627	0.244805
										11.79	0.172997	0.165606	0.246861
										11.82	0.172784	0.165593	0.249311
										11.85	0.17258	0.165575	0.251449
										11.88	0.172384	0.165558	0.25358
										11.91	0.17218	0.165569	0.255748
										11.94	0.172012	0.165647	0.258305
										11.97	0.171828	0.16569	0.260557
										12	0.17167	0.165738	0.262769
										12.03	0.171451	0.165754	0.264983
										12.06	0.17125	0.165791	0.267575
										12.09	0.171034	0.165864	0.269822
										12.12	0.170808	0.165928	0.272103
										12.12	0.170542	0.165937	0.272491
										12.15	0.170337	0.166013	0.274423
										12.18	0.170206	0.166107	0.277092
										12.21	0.170097	0.166197	0.279403
										12.24	0.169974	0.166339	0.281634
										12.27	0.169886	0.166475	0.283904
										12.3	0.169765	0.166635	0.286581
										12.33	0.169611	0.166787	0.288864
										12.36	0.169486	0.166946	0.291152
										12.39	0.169376	0.167114	0.293439
										12.42	0.169256	0.167334	0.296102
										12.45	0.169158	0.167525	0.298388
										12.48	0.169072	0.167705	0.300611
										12.51	0.168958	0.167911	0.302828
										12.54	0.168843	0.168194	0.305411
										12.57	0.168739	0.168462	0.307609
										12.6	0.16862	0.168748	0.30975
										12.63	0.168566	0.169062	0.311877
										12.66	0.168488	0.169397	0.314341
										12.69	0.168392	0.169683	0.316406
										12.72	0.168251	0.170002	0.318473
										12.75	0.168161	0.170344	0.320488
										12.78	0.168116	0.170734	0.322774
										12.81	0.168086	0.171078	0.324702
										12.84	0.168042	0.171467	0.32659
										12.87	0.167979	0.17188	0.328423
										12.9	0.167908	0.172397	0.3305
										12.93	0.16785	0.172804	0.332285
										12.96	0.167819	0.173248	0.333986
										12.99	0.167882	0.173691	0.335667
										13.02	0.167943	0.174244	0.337557
										13.05	0.168007	0.174763	0.339153
										13.08	0.168135	0.175269	0.340681
										13.11	0.168289	0.175824	0.342156
										13.14	0.168437	0.176545	0.343826
										13.17	0.168609	0.177155	0.345206
										13.2	0.168806	0.177797	0.346535
										13.23	0.169009	0.17845	0.347835
										13.26	0.169241	0.179273	0.349261
										13.29	0.16947	0.179974	0.350465
										13.32	0.169732	0.180726	0.351581
										13.35	0.169985	0.181543	0.352621
										13.38	0.170236	0.182525	0.353792
										13.41	0.170527	0.183348	0.354725
										13.44	0.170927	0.184212	0.35562
										13.47	0.171327	0.185099	0.356453
										13.5	0.17174	0.186174	0.357334
										13.53	0.172234	0.187131	0.358054
										13.56	0.172662	0.188114	0.358735
										13.59	0.173156	0.189135	0.359345
										13.62	0.17366	0.19036	0.36
										13.65	0.174288	0.191475	0.360502
										13.68	0.174862	0.192603	0.360947
										13.71	0.175498	0.193732	0.361357
										13.74	0.176144	0.195063	0.361727
										13.77	0.17692	0.19626	0.362012
										13.8	0.177616	0.197505	0.362244
										13.83	0.178348	0.198761	0.362462
										13.86	0.179152	0.200244	0.362669
										13.89	0.180135	0.201547	0.362765
										13.92	0.181003	0.202871	0.362853
										13.95	0.181931	0.204213	0.362901
										13.98	0.182906	0.205817	0.362954
										14.01	0.184133	0.207234	0.362925
										14.04	0.18528	0.208663	0.362836
										14.07	0.186487	0.210131	0.362719
										14.1	0.187752	0.211819	0.362574
										14.13	0.189285	0.213346	0.362426
										14.16	0.190608	0.214893	0.362248
										14.19	0.191959	0.216449	0.362004
										14.22	0.193339	0.21831	0.361698
										14.25	0.195044	0.219946	0.361431
										14.28	0.19656	0.221598	0.361122
										14.31	0.198125	0.223217	0.360794
										14.34	0.199785	0.225104	0.360375
										14.37	0.201773	0.226759	0.360013
										14.4	0.203505	0.228442	0.359559
										14.43	0.205281	0.230144	0.359173
										14.46	0.207115	0.23214	0.358659
										14.49	0.209317	0.233875	0.35815
										14.52	0.211229	0.235581	0.357599
										14.55	0.213186	0.237309	0.357031
										14.58	0.215162	0.239379	0.356357
										14.61	0.217504	0.241131	0.355784
										14.64	0.219563	0.24288	0.355175
										14.67	0.221653	0.244589	0.354538
										14.7	0.223794	0.246592	0.353745
										14.73	0.226341	0.248329	0.353063
										14.76	0.228565	0.250038	0.352388
										14.79	0.230761	0.251711	0.351556
										14.82	0.232973	0.253622	0.350807
										14.85	0.235552	0.255268	0.35004
										14.88	0.237794	0.256924	0.349286
										14.91	0.240067	0.258568	0.348394
										14.94	0.242321	0.260429	0.347616
										14.97	0.244827	0.262001	0.346799
										15	0.246898	0.263517	0.345953
										15.03	0.24892	0.265008	0.345001
										15.06	0.250938	0.266703	0.344164
										15.09	0.253255	0.268076	0.343273
										15.12	0.255167	0.269434	0.3424
										15.15	0.257026	0.270659	0.341339
										15.18	0.257338	0.272298	0.340439
										15.21	0.258845	0.273564	0.339537
										15.24	0.260873	0.274754	0.338618
										15.27	0.262574	0.275902	0.337553
										15.3	0.264204	0.277225	0.336614
										15.33	0.265815	0.278353	0.335661
										15.36	0.267643	0.279394	0.334708
										15.39	0.269107	0.280353	0.333608
										15.42	0.270449	0.281415	0.332712
										15.45	0.271743	0.282267	0.331664
										15.48	0.273189	0.28305	0.330708
										15.51	0.274399	0.283806	0.329552
										15.54	0.275534	0.284615	0.328564
										15.57	0.276615	0.285222	0.327582
										15.6	0.277779	0.285771	0.326574
										15.63	0.27867	0.286285	0.325447
										15.66	0.279552	0.286778	0.324512
										15.69	0.280398	0.287093	0.323561
										15.72	0.281259	0.28736	0.322601
										15.75	0.28193	0.287556	0.32149
										15.78	0.282532	0.287743	0.320535
										15.81	0.283049	0.287845	0.319593
										15.84	0.283511	0.287884	0.318676
										15.87	0.283815	0.287807	0.317607
										15.9	0.284051	0.287624	0.316643
										15.93	0.284193	0.287424	0.315721
										15.96	0.284235	0.287199	0.314844
										15.99	0.284184	0.286917	0.313823
										16.02	0.284088	0.286489	0.312935
										16.05	0.28395	0.28607	0.312025
										16.08	0.283678	0.285592	0.311118
										16.11	0.28337	0.285064	0.310102
										16.14	0.283021	0.284409	0.30926
										16.17	0.282555	0.28381	0.308404
										16.2	0.281852	0.283201	0.307544
										16.23	0.281189	0.282553	0.306513
										16.26	0.28048	0.281708	0.305646
										16.29	0.279735	0.280941	0.304802
										16.32	0.278786	0.280135	0.303967
										16.35	0.277871	0.279293	0.302944
										16.38	0.27685	0.278296	0.302121
										16.41	0.27575	0.277425	0.30131
										16.44	0.274448	0.276505	0.300505
										16.47	0.273282	0.275513	0.299523
										16.5	0.272121	0.274377	0.298705
										16.53	0.270947	0.27338	0.297887
										16.56	0.269483	0.272342	0.297093
										16.59	0.268178	0.27126	0.296189
										16.62	0.26679	0.269955	0.295414
										16.65	0.265384	0.268781	0.294643
										16.68	0.263675	0.267638	0.293873
										16.71	0.262174	0.266477	0.29303
										16.74	0.260648	0.265045	0.29231
										16.77	0.259134	0.263776	0.291624
										16.8	0.25739	0.262471	0.290942
										16.83	0.255866	0.261144	0.29015
										16.86	0.254359	0.25959	0.289476
										16.89	0.252863	0.258272	0.28883
										16.92	0.251122	0.2569	0.288204
										16.95	0.249666	0.255493	0.287499
										16.98	0.248237	0.253848	0.286865
										17.01	0.246777	0.252432	0.286273
										17.04	0.244979	0.250997	0.285706
										17.07	0.243381	0.249556	0.285094
										17.1	0.241751	0.247881	0.284576
										17.13	0.240131	0.246452	0.284046
										17.16	0.238274	0.245033	0.283546
										17.19	0.236645	0.243602	0.282979
										17.22	0.235016	0.241935	0.282489
										17.25	0.233408	0.240541	0.282021
										17.28	0.231522	0.239136	0.281558
										17.31	0.229933	0.237717	0.281039
										17.34	0.228316	0.236116	0.280613
										17.37	0.226663	0.234759	0.280225
										17.37	0.224774	0.234523	0.28015
										17.4	0.223197	0.233382	0.279854
										17.43	0.221673	0.232044	0.27941
										17.46	0.220143	0.230489	0.279043
										17.49	0.21833	0.229183	0.278696
										17.52	0.216814	0.227894	0.278388
										17.55	0.215361	0.226588	0.278031
										17.58	0.213903	0.225061	0.277735
										17.61	0.212244	0.223784	0.277465
										17.64	0.210867	0.222529	0.27721
										17.67	0.209505	0.221307	0.276954
										17.7	0.208188	0.219848	0.276764
										17.73	0.206722	0.218554	0.276574
										17.76	0.205484	0.217337	0.276364
										17.79	0.204254	0.216127	0.276175
										17.82	0.203051	0.214766	0.276073
										17.85	0.20171	0.213605	0.275985
										17.88	0.200643	0.212427	0.275924
										17.91	0.199592	0.211252	0.275899
										17.94	0.198504	0.209923	0.275901
										17.97	0.197188	0.208797	0.275935
										18	0.19605	0.207692	0.27597
										18.03	0.194946	0.206604	0.276061
										18.06	0.19386	0.205376	0.276146
										18.09	0.192614	0.204346	0.276282
										18.12	0.191576	0.203339	0.276456
										18.15	0.190555	0.202328	0.276743
										18.18	0.189569	0.201174	0.277019
										18.21	0.18843	0.200198	0.27731
										18.24	0.187492	0.199222	0.277628
										18.27	0.186564	0.198318	0.278079
										18.3	0.185649	0.197291	0.278535
										18.33	0.184607	0.196354	0.278999
										18.36	0.183747	0.195439	0.279493
										18.39	0.182883	0.19454	0.280122
										18.42	0.182023	0.193562	0.280717
										18.45	0.181022	0.192767	0.281376
										18.48	0.180213	0.191962	0.282083
										18.51	0.179425	0.190985	0.282992
										18.54	0.178651	0.190146	0.283818
										18.57	0.177789	0.189368	0.284719
										18.6	0.177052	0.188598	0.285649
										18.63	0.176372	0.187684	0.286821
										18.66	0.175736	0.186986	0.287892
										18.69	0.175028	0.186287	0.288984
										18.72	0.17441	0.185576	0.290173
										18.75	0.173833	0.184762	0.291664
										18.78	0.173318	0.184109	0.293006
										18.81	0.172759	0.18345	0.294365
										18.84	0.172268	0.182814	0.295802
										18.87	0.17175	0.182193	0.297567
										18.9	0.171224	0.181647	0.299109
										18.93	0.170643	0.181132	0.300717
										18.96	0.170185	0.180612	0.302388
										18.99	0.169749	0.180018	0.304391
										19.02	0.169341	0.179558	0.306192
										19.05	0.168909	0.179137	0.308031
										19.08	0.168557	0.178699	0.309911
										19.11	0.168238	0.178225	0.312138
										19.14	0.167967	0.177841	0.314113
										19.17	0.167687	0.177544	0.316126
										19.2	0.167434	0.177256	0.318185
										19.23	0.167205	0.176923	0.320618
										19.26	0.16699	0.176675	0.322716
										19.29	0.166792	0.176407	0.324844
										19.32	0.166676	0.176187	0.327033
										19.35	0.166542	0.175938	0.329613
										19.38	0.1664	0.175736	0.331864
										19.41	0.166289	0.175563	0.334063
										19.44	0.166255	0.17538	0.336297
										19.47	0.16623	0.175255	0.338976
										19.5	0.166218	0.175243	0.341281
										19.53	0.166264	0.175203	0.343561
										19.56	0.166383	0.175189	0.345846
										19.59	0.166557	0.175204	0.348447
										19.62	0.166725	0.175273	0.350683
										19.65	0.166941	0.175372	0.352934
										19.68	0.167154	0.17548	0.355197
										19.71	0.167407	0.175622	0.35782
										19.74	0.167688	0.175807	0.359829
										19.77	0.168042	0.176066	0.362183
										19.8	0.16834	0.176343	0.364347
										19.83	0.168652	0.176715	0.366799
										19.86	0.169001	0.177057	0.368887
										19.89	0.169457	0.177416	0.370913
										19.92	0.169911	0.177812	0.372885
										19.95	0.170416	0.178312	0.375207
										19.98	0.170957	0.178761	0.377147
										20.01	0.171685	0.17924	0.379026
										20.04	0.172397	0.179735	0.380861
										20.07	0.173127	0.18039	0.38292
										20.1	0.173877	0.181027	0.384691
										20.13	0.174794	0.181715	0.3864
										20.16	0.175581	0.182447	0.38808
										20.19	0.176613	0.183299	0.389977
										20.22	0.177753	0.184052	0.391543
										20.25	0.178803	0.18487	0.393053
										20.28	0.179894	0.185757	0.394536
										20.31	0.181044	0.186813	0.396148
										20.34	0.182496	0.187761	0.397439
										20.37	0.183776	0.188736	0.398702
										20.4	0.184002	0.189747	0.399967
										20.43	0.185141	0.191001	0.40139
										20.46	0.1866	0.192126	0.402516
										20.49	0.188342	0.193262	0.403557
										20.52	0.189914	0.194346	0.404543
										20.55	0.191549	0.195897	0.405667
										20.58	0.193211	0.197207	0.406601
										20.61	0.195187	0.198523	0.40747
										20.64	0.19699	0.199846	0.408266
										20.67	0.19887	0.201451	0.409123
										20.7	0.200616	0.202909	0.409829
										20.73	0.20307	0.204374	0.410442
										20.76	0.205062	0.205897	0.411017
										20.79	0.207123	0.207672	0.411645
										20.82	0.209253	0.209253	0.412129
										20.85	0.211787	0.210879	0.412557
										20.88	0.213789	0.212542	0.412978
										20.91	0.216229	0.214532	0.413401
										20.94	0.218553	0.216259	0.413682
										20.97	0.221296	0.218007	0.413967
										21	0.22366	0.219778	0.414186
										21.03	0.22606	0.221893	0.41443
										21.06	0.228287	0.223708	0.414607
										21.09	0.231371	0.225571	0.414724
										21.12	0.233877	0.227455	0.414804
										21.15	0.236366	0.229642	0.414885
										21.18	0.238847	0.23151	0.414965
										21.21	0.241758	0.233392	0.415035
										21.24	0.244246	0.235296	0.415042
										21.27	0.246722	0.237481	0.414968
										21.3	0.249224	0.239375	0.41491
										21.33	0.252166	0.241274	0.414845
										21.36	0.254646	0.24317	0.414747
										21.39	0.257139	0.245362	0.414651
										21.42	0.259643	0.247203	0.414481
										21.45	0.262528	0.249063	0.414312
										21.48	0.264936	0.250937	0.414132
										21.51	0.267341	0.2531	0.413983
										21.54	0.269698	0.254913	0.41379
										21.57	0.272392	0.25667	0.413602
										21.6	0.274674	0.258295	0.413363
										21.63	0.276887	0.260511	0.41316
										21.66	0.279063	0.262273	0.412942
										21.69	0.281541	0.264005	0.412713
										21.72	0.28364	0.265675	0.412448
										21.75	0.285711	0.267609	0.412225
										21.78	0.287732	0.269299	0.412008
										21.81	0.290012	0.270932	0.411771
										21.84	0.291934	0.272523	0.41148
										21.87	0.293781	0.274307	0.411241
										21.9	0.295569	0.275834	0.410992
										21.93	0.297558	0.277348	0.410722
										21.96	0.299055	0.278827	0.410447
										21.99	0.300787	0.280471	0.410247
										22.02	0.302295	0.281847	0.410015
										22.05	0.303949	0.283205	0.409749
										22.08	0.305259	0.284534	0.40949
										22.11	0.306517	0.286061	0.409279
										22.14	0.307601	0.287294	0.409064
										22.17	0.309003	0.288433	0.408885
										22.2	0.310064	0.289564	0.408667
										22.23	0.311087	0.290839	0.408507
										22.26	0.311983	0.291915	0.408296
										22.29	0.31295	0.292941	0.408123
										22.32	0.313673	0.293938	0.407921
										22.35	0.314479	0.295048	0.40773
										22.38	0.315148	0.295938	0.407585
										22.41	0.315849	0.296773	0.407479
										22.44	0.316387	0.297596	0.40734
										22.47	0.316833	0.298504	0.407212
										22.5	0.317252	0.299274	0.407062
										22.53	0.317641	0.29997	0.40695
										22.56	0.317893	0.300647	0.406793
										22.59	0.318086	0.301384	0.406713
										22.62	0.318277	0.301963	0.406636
										22.62	0.318453	0.302059	0.406613
										22.65	0.318562	0.302428	0.406528
										22.68	0.31863	0.302929	0.406413
										22.71	0.318601	0.303411	0.406322
										22.74	0.318514	0.303779	0.406233
										22.77	0.318416	0.304035	0.406187
										22.8	0.318258	0.304254	0.406138
										22.83	0.318009	0.304481	0.40607
										22.86	0.317667	0.304688	0.406032
										22.89	0.317333	0.304809	0.406043
										22.92	0.316938	0.304879	0.406056
										22.95	0.316521	0.304893	0.406069
										22.98	0.316002	0.304826	0.406061
										23.01	0.315469	0.304737	0.406039
										23.04	0.314901	0.304648	0.406066
										23.07	0.314311	0.304471	0.406126
										23.1	0.313566	0.304248	0.406174
										23.13	0.312863	0.303999	0.406182
										23.16	0.312118	0.303684	0.406232
										23.19	0.31144	0.303306	0.406306
										23.22	0.310477	0.302925	0.406353
										23.25	0.30971	0.302492	0.406442
										23.28	0.308916	0.302082	0.40652
										23.31	0.308073	0.301587	0.406614
										23.34	0.307035	0.301147	0.406739
										23.37	0.306209	0.300641	0.406859
										23.4	0.305216	0.30008	0.406954
										23.43	0.304292	0.29936	0.406997
										23.46	0.303191	0.298745	0.407071
										23.49	0.302208	0.298114	0.407169
										23.52	0.301225	0.297462	0.407314
										23.55	0.30026	0.296646	0.407406
										23.58	0.299151	0.295919	0.407491
										23.61	0.298179	0.295191	0.407548
										23.64	0.297194	0.294437	0.407632
										23.67	0.296214	0.293562	0.4077
										23.7	0.295108	0.292797	0.407749
										23.73	0.29413	0.291965	0.407816
										23.76	0.293181	0.291134	0.407897
										23.79	0.292207	0.2902	0.40795
										23.82	0.291012	0.289398	0.407986
										23.85	0.290027	0.288583	0.408013
										23.88	0.289058	0.287714	0.408017
										23.91	0.288058	0.286715	0.408011
										23.94	0.286913	0.285835	0.408018
										23.97	0.28589	0.284994	0.408015
										24	0.284867	0.28416	0.407983
										24.03	0.283895	0.283151	0.407943
										24.06	0.282764	0.282312	0.40789
										24.09	0.281801	0.2815	0.407835
										24.12	0.280873	0.280694	0.407779
										24.15	0.279932	0.279725	0.407697
										24.18	0.278887	0.278859	0.407613
										24.21	0.277965	0.278038	0.407523
										24.24	0.277009	0.277226	0.407349
										24.27	0.276181	0.27631	0.407227
										24.3	0.275075	0.275521	0.407104
										24.33	0.274239	0.27474	0.406966
										24.36	0.273449	0.273932	0.406782
										24.39	0.272641	0.273037	0.406588
										24.42	0.271779	0.272271	0.406418
										24.45	0.271142	0.27148	0.40623
										24.48	0.27036	0.270702	0.405974
										24.51	0.269639	0.269808	0.405737
										24.54	0.268809	0.269094	0.405514
										24.57	0.268109	0.268378	0.405254
										24.6	0.267431	0.267654	0.404947
										24.63	0.266803	0.266828	0.404668
										24.66	0.266097	0.266141	0.404369
										24.69	0.265509	0.265463	0.404078
										24.72	0.264937	0.264796	0.403759
										24.75	0.264354	0.264061	0.403511
										24.78	0.263727	0.263453	0.403182
										24.81	0.263221	0.262843	0.402844
										24.84	0.262709	0.262248	0.402462
										24.87	0.262211	0.26162	0.402134
										24.9	0.26167	0.261081	0.401811
										24.93	0.261256	0.26055	0.401507
										24.96	0.260836	0.260042	0.401063
										24.99	0.26043	0.259478	0.400682
										25.02	0.260013	0.259046	0.400328
										25.05	0.259677	0.258632	0.400001
										25.08	0.259406	0.258238	0.399631
										25.11	0.259203	0.257782	0.399281
										25.14	0.258921	0.257437	0.39891
										25.17	0.258702	0.257114	0.398569
										25.2	0.258475	0.256777	0.39817
										25.23	0.258299	0.256493	0.397838
										25.26	0.258134	0.256227	0.397504
										25.29	0.258011	0.255994	0.3972
										25.32	0.257922	0.25577	0.396787
										25.35	0.257847	0.255603	0.396474
										25.38	0.25778	0.255425	0.396191
										25.41	0.257755	0.25527	0.395899
										25.44	0.257793	0.255128	0.395491
										25.47	0.257837	0.255056	0.395168
										25.5	0.257913	0.255013	0.394901
										25.53	0.258015	0.254967	0.394667
										25.56	0.258169	0.254965	0.394328
										25.59	0.25832	0.255022	0.394026
										25.62	0.258511	0.255139	0.393783
										25.65	0.258543	0.255254	0.393573
										25.68	0.258715	0.25549	0.39331
										25.71	0.258978	0.255664	0.393091
										25.74	0.259291	0.255859	0.392866
										25.77	0.259599	0.256099	0.392667
										25.8	0.260116	0.256513	0.392446
										25.83	0.260547	0.256842	0.39228
										25.86	0.260863	0.2573	0.392095
										25.89	0.261612	0.25778	0.391938
										25.92	0.262216	0.258372	0.391743
										25.95	0.262802	0.258938	0.391579
										25.98	0.263447	0.2596	0.391466
										26.01	0.264248	0.260227	0.39134
										26.04	0.264998	0.261145	0.391139
										26.07	0.265806	0.261971	0.391047
										26.1	0.266703	0.262863	0.390935
										26.13	0.267779	0.263826	0.390867
										26.16	0.268749	0.264967	0.390774
										26.19	0.26979	0.266075	0.390706
										26.22	0.27087	0.267198	0.390631
										26.25	0.272211	0.268429	0.3906
										26.28	0.273442	0.269955	0.390586
										26.31	0.27469	0.2713	0.390563
										26.34	0.275987	0.272708	0.390533
										26.37	0.277574	0.274196	0.390544
										26.4	0.279005	0.27603	0.390506
										26.43	0.280447	0.277687	0.390525
										26.46	0.281915	0.279394	0.390557
										26.49	0.283683	0.28115	0.390577
										26.52	0.285224	0.283284	0.390618
										26.55	0.286768	0.285152	0.390686
										26.58	0.288359	0.287043	0.390821
										26.61	0.290224	0.288987	0.390961
										26.64	0.291708	0.291296	0.391098
										26.67	0.293516	0.293292	0.39123
										26.7	0.295156	0.295401	0.391398
										26.73	0.296501	0.29753	0.391571
										26.76	0.29866	0.300014	0.391795
										26.79	0.30039	0.302215	0.391989
										26.82	0.302041	0.304395	0.392241
										26.85	0.303936	0.3066	0.392467
										26.88	0.305507	0.309156	0.392746
										26.91	0.307021	0.31139	0.39296
										26.94	0.308774	0.313551	0.393229
										26.97	0.31021	0.315675	0.393538
										27	0.311576	0.318159	0.393919
										27.03	0.31292	0.320322	0.394264
										27.06	0.314447	0.322441	0.394643
										27.09	0.315675	0.324525	0.395009
										27.12	0.316841	0.326846	0.395377
										27.15	0.317925	0.328808	0.395753
										27.18	0.319106	0.330727	0.396162
										27.21	0.320022	0.33261	0.39656
										27.24	0.320879	0.334667	0.397033
										27.27	0.321633	0.336315	0.39743
										27.3	0.322445	0.337882	0.397859
										27.33	0.323054	0.339365	0.398305
										27.36	0.32352	0.340979	0.398862
										27.39	0.323907	0.342257	0.399333
										27.42	0.32428	0.343451	0.399811
										27.45	0.324549	0.344571	0.400303
										27.48	0.32474	0.345766	0.400883
										27.51	0.324834	0.346671	0.401388
										27.54	0.324791	0.347458	0.401882
										27.57	0.324693	0.348133	0.402369
										27.6	0.324557	0.348745	0.402944
										27.63	0.324325	0.349206	0.40347
										27.66	0.32399	0.349504	0.404005
										27.69	0.323617	0.349719	0.404521
										27.72	0.32318	0.349796	0.405131
										27.75	0.322642	0.349783	0.405641
										27.78	0.322051	0.349649	0.4062
										27.81	0.321249	0.349435	0.406725
										27.84	0.320465	0.349094	0.40742
										27.85	0.319641	0.34903	0.407506
										27.87	0.318649	0.34867	0.40795
										27.9	0.317733	0.348156	0.408469
										27.93	0.316806	0.347551	0.408977
										27.96	0.31578	0.346734	0.409582
										27.99	0.314552	0.346013	0.410061
										28.02	0.313484	0.345104	0.410593
										28.05	0.312371	0.344186	0.411082
										28.08	0.31121	0.343004	0.41161
										28.11	0.309808	0.341919	0.412097
										28.14	0.308574	0.340781	0.412596
										28.17	0.307299	0.339678	0.413038
										28.2	0.306011	0.338134	0.413623
										28.23	0.30446	0.33685	0.414048
										28.26	0.303147	0.335493	0.41444
										28.29	0.301809	0.334081	0.41491
										28.32	0.300469	0.332387	0.415264
										28.35	0.298929	0.330896	0.415661
										28.38	0.297569	0.329419	0.416006
										28.41	0.296225	0.327897	0.4164
										28.44	0.294884	0.326084	0.416711
										28.47	0.293314	0.324487	0.417017
										28.5	0.291936	0.322906	0.417303
										28.53	0.290533	0.321288	0.417632
										28.56	0.289167	0.319411	0.417907
										28.59	0.287579	0.317761	0.418177
										28.62	0.286258	0.316109	0.418414
										28.65	0.284929	0.31446	0.418672
										28.68	0.283622	0.312537	0.418851
										28.71	0.282122	0.310922	0.418999
										28.74	0.280831	0.309289	0.419179
										28.77	0.279581	0.307658	0.419384
										28.8	0.278352	0.30573	0.419519
										28.83	0.276949	0.304107	0.419619
										28.86	0.275746	0.302489	0.419697
										28.89	0.27459	0.300879	0.419812
										28.92	0.273457	0.299034	0.419899
										28.95	0.272157	0.297443	0.419944
										28.98	0.271048	0.295845	0.419971
										29.01	0.269951	0.294298	0.420016
										29.04	0.268912	0.292506	0.420044
										29.07	0.267699	0.29098	0.420029
										29.1	0.266812	0.289468	0.419987
										29.13	0.265767	0.28796	0.419926
										29.16	0.264788	0.286246	0.419873
										29.19	0.263683	0.284818	0.419882
										29.22	0.262743	0.283393	0.419818
										29.25	0.261831	0.282123	0.419697
										29.28	0.260912	0.280375	0.419576
										29.31	0.259844	0.278987	0.419476
										29.34	0.258944	0.277637	0.419352
										29.37	0.258092	0.276283	0.419256
										29.4	0.257266	0.274746	0.419121
										29.43	0.256343	0.273491	0.418927
										29.46	0.255522	0.272242	0.418756
										29.49	0.254719	0.271012	0.418568
										29.52	0.254034	0.269615	0.418439
										29.55	0.253072	0.268442	0.418286
										29.58	0.252304	0.267302	0.418082
										29.61	0.251541	0.266155	0.417865
										29.64	0.250853	0.264867	0.417635
										29.67	0.249999	0.263769	0.417434
										29.7	0.249339	0.262698	0.417283
										29.73	0.248687	0.261658	0.417071
										29.76	0.248022	0.260474	0.416859
										29.79	0.247281	0.259524	0.416661
										29.82	0.246678	0.258613	0.416487
										29.85	0.246057	0.257717	0.416292
										29.88	0.245503	0.256687	0.416084
										29.91	0.244869	0.255794	0.415887
										29.94	0.244358	0.254906	0.415703
										29.97	0.243854	0.254007	0.4155
										30	0.243318	0.252982	0.41535
										30.03	0.242743	0.252147	0.415164
										30.06	0.242239	0.251327	0.414979
										30.09	0.24172	0.25056	0.414779
										30.12	0.241208	0.249695	0.414657
										30.15	0.240658	0.249015	0.414515
										30.18	0.240189	0.248161	0.414341
										30.21	0.239718	0.247398	0.414143
										30.24	0.239254	0.24656	0.413964
										30.27	0.238749	0.245875	0.413828
										30.3	0.238347	0.2452	0.413702
										30.33	0.238023	0.244487	0.413497
										30.36	0.237736	0.243676	0.4133
										30.39	0.237395	0.242989	0.413157
										30.42	0.237078	0.242295	0.41305
										30.45	0.236727	0.241644	0.412889
										30.48	0.236356	0.240871	0.412761
										30.51	0.235976	0.240208	0.412579
										30.54	0.235618	0.239569	0.412403
										30.57	0.235272	0.238942	0.412204
										30.6	0.234906	0.238213	0.412052
										30.63	0.234519	0.237606	0.411863
										30.66	0.234183	0.237005	0.411683
										30.69	0.233858	0.236428	0.41144
										30.72	0.233514	0.235771	0.41126
										30.75	0.233097	0.235217	0.411086
										30.78	0.232731	0.234653	0.410907
										30.81	0.232391	0.234044	0.410662
										30.84	0.231995	0.233396	0.410489
										30.87	0.231497	0.232886	0.410261
										30.9	0.231428	0.232375	0.410076
										30.93	0.231065	0.231852	0.409831
										30.96	0.230649	0.231275	0.409564
										30.99	0.230244	0.230784	0.409303
										31.02	0.22982	0.230313	0.409044
										31.05	0.22952	0.229884	0.408767
										31.08	0.229222	0.229336	0.40849
										31.11	0.228957	0.228864	0.408234
										31.14	0.228598	0.228415	0.407985
										31.17	0.228314	0.22797	0.407682
										31.2	0.228024	0.227458	0.407433
										31.23	0.227701	0.22704	0.40716
										31.26	0.22736	0.226604	0.406851
										31.29	0.227095	0.226151	0.40653
										31.32	0.226812	0.225636	0.406227
										31.35	0.226555	0.225214	0.405928
										31.38	0.226249	0.22479	0.405672
										31.41	0.225981	0.22439	0.405187
										31.44	0.225753	0.223835	0.404821
										31.47	0.225498	0.223414	0.404458
										31.5	0.225208	0.222987	0.404085
										31.53	0.224832	0.222551	0.403661
										31.56	0.224461	0.222035	0.403293
										31.59	0.224127	0.221574	0.402818
										31.62	0.223736	0.221122	0.402429
										31.65	0.223373	0.220683	0.401954
										31.68	0.222995	0.220198	0.401511
										31.71	0.22262	0.219758	0.401093
										31.74	0.222201	0.219315	0.400758
										31.77	0.221827	0.218878	0.400132
										31.8	0.221441	0.218381	0.399702
										31.83	0.221057	0.217913	0.399281
										31.86	0.220542	0.217464	0.398852
										31.89	0.220143	0.217013	0.398342
										31.92	0.21971	0.216512	0.397928
										31.95	0.219242	0.216141	0.397445
										31.98	0.21864	0.215653	0.397003
										32.01	0.218146	0.215109	0.396467
										32.04	0.217619	0.214635	0.395983
										32.07	0.217143	0.214123	0.395486
										32.1	0.216605	0.21364	0.395038
										32.13	0.216124	0.213087	0.394568
										32.16	0.215659	0.212635	0.394127
										32.19	0.215249	0.212173	0.393673
										32.22	0.214688	0.211733	0.393225
										32.25	0.214244	0.211221	0.392735
										32.28	0.213784	0.210758	0.392287
										32.31	0.213304	0.210272	0.391843
										32.34	0.212781	0.209775	0.391407
										32.37	0.212314	0.209208	0.390893
										32.4	0.211854	0.208737	0.390481
										32.43	0.211355	0.208259	0.390069
										32.46	0.21076	0.207757	0.38964
										32.49	0.21029	0.207141	0.389179
										32.52	0.20982	0.206606	0.388786
										32.55	0.209328	0.206093	0.388413
										32.58	0.208746	0.205589	0.388066
										32.61	0.208287	0.204975	0.387628
										32.64	0.207869	0.204499	0.387324
										32.67	0.207441	0.203917	0.386913
										32.7	0.20692	0.203396	0.38657
										32.73	0.206429	0.202779	0.386172
										32.76	0.205901	0.202205	0.385856
										32.79	0.205378	0.201685	0.385568
										32.82	0.204798	0.201155	0.385231
										32.85	0.204317	0.2006	0.384895
										32.88	0.203859	0.200089	0.384599
										32.91	0.20336	0.199569	0.38435
										32.94	0.202818	0.199057	0.384075
										32.97	0.202395	0.198451	0.383776
										33	0.201989	0.197943	0.383544
										33.03	0.201559	0.197463	0.383315
										33.06	0.201056	0.196965	0.383085
										33.09	0.200671	0.196417	0.382818
										33.1	0.200209	0.196346	0.382778
										33.12	0.199772	0.195955	0.382593
										33.15	0.199261	0.195479	0.382358
										33.18	0.198826	0.195061	0.382157
										33.21	0.1984	0.194484	0.381988
										33.24	0.198025	0.194046	0.381839
										33.27	0.197551	0.193608	0.381673
										33.3	0.197161	0.193146	0.381523
										33.33	0.196753	0.192661	0.381387
										33.36	0.196374	0.192295	0.381264
										33.39	0.195935	0.191801	0.381182
										33.42	0.195576	0.191363	0.381052
										33.45	0.19519	0.19089	0.38091
										33.48	0.194793	0.190523	0.38081
										33.51	0.194394	0.190142	0.380716
										33.54	0.194068	0.189798	0.380626
										33.57	0.193748	0.189292	0.38048
										33.6	0.193432	0.188876	0.380413
										33.63	0.193021	0.188503	0.380323
										33.66	0.192666	0.188119	0.380243
										33.69	0.192306	0.187656	0.380179
										33.72	0.191922	0.187271	0.380112
										33.75	0.191627	0.186852	0.380011
										33.78	0.191269	0.186475	0.379934
										33.81	0.190962	0.186099	0.379868
										33.84	0.190598	0.185764	0.379816
										33.87	0.190316	0.185361	0.379781
										33.9	0.190034	0.18498	0.379689
										33.93	0.189732	0.184493	0.379595
										33.96	0.189365	0.184146	0.379535
										33.99	0.189039	0.183791	0.379474
										34.02	0.188746	0.183411	0.37941
										34.05	0.188427	0.182979	0.37933
										34.08	0.188061	0.182623	0.379264
										34.11	0.187738	0.182267	0.379202
										34.14	0.18743	0.181918	0.379139
										34.17	0.187146	0.181541	0.37904
										34.2	0.18682	0.181198	0.378919
										34.23	0.186553	0.180845	0.378855
										34.26	0.186296	0.180575	0.378804
										34.29	0.186011	0.180202	0.378719
										34.32	0.185664	0.179913	0.378628
										34.35	0.185381	0.179596	0.378501
										34.38	0.185103	0.179269	0.378382
										34.41	0.184856	0.178941	0.378283
										34.44	0.184548	0.178736	0.378204
										34.47	0.184248	0.178397	0.378071
										34.5	0.183947	0.178114	0.377931
										34.53	0.183669	0.177862	0.377747
										34.56	0.183356	0.177716	0.377622
										34.59	0.183086	0.177553	0.377517
										34.62	0.18284	0.177354	0.377398
										34.65	0.182646	0.177114	0.377249
										34.68	0.182355	0.176904	0.377118
										34.71	0.182108	0.176691	0.376973
										34.74	0.181961	0.176481	0.376831
										34.77	0.181707	0.176217	0.376658
										34.8	0.181479	0.175954	0.376549
										34.83	0.181302	0.175711	0.376393
										34.86	0.181091	0.175482	0.376244
										34.89	0.180907	0.175227	0.376073
										34.92	0.180706	0.175012	0.37593
										34.95	0.18057	0.174819	0.375782
										34.98	0.180421	0.174713	0.375617
										35.01	0.180243	0.174508	0.375516
										35.04	0.180036	0.174303	0.375417
										35.07	0.179903	0.174027	0.375316
										35.1	0.179803	0.173698	0.37515
										35.13	0.179661	0.173307	0.375006
										35.16	0.179479	0.173011	0.374835
										35.19	0.179339	0.172677	0.37469
										35.22	0.17916	0.172392	0.374528
										35.25	0.178992	0.172086	0.374383
										35.28	0.178783	0.171874	0.374227
										35.31	0.178633	0.171697	0.374091
										35.34	0.178441	0.171576	0.373908
										35.37	0.178259	0.171355	0.37379
										35.4	0.178039	0.171134	0.373613
										35.43	0.177861	0.170864	0.373426
										35.46	0.177703	0.170555	0.373192
										35.49	0.177528	0.170189	0.372959
										35.52	0.177333	0.169965	0.372719
										35.55	0.177164	0.169593	0.372488
										35.58	0.177023	0.169286	0.372234
										35.61	0.176843	0.169003	0.372016
										35.64	0.176634	0.168798	0.37178
										35.67	0.176486	0.168619	0.371542
										35.7	0.176372	0.168427	0.371242
										35.73	0.176266	0.168178	0.37097
										35.76	0.176118	0.167984	0.370704
										35.79	0.176007	0.16779	0.370462
										35.82	0.17592	0.167592	0.370189
										35.85	0.175839	0.167343	0.369964
										35.88	0.175776	0.167212	0.36961
										35.91	0.175747	0.167002	0.369332
										35.94	0.175693	0.166865	0.369046
										35.97	0.175647	0.166783	0.368826
										36	0.17563	0.1667	0.368598
										36.03	0.175658	0.166627	0.368354
										36.06	0.175707	0.166592	0.368074
										36.09	0.175767	0.16657	0.367847
										36.12	0.175781	0.166567	0.367607
										36.15	0.175877	0.166586	0.367384
										36.18	0.175961	0.166604	0.3671
										36.21	0.176068	0.166672	0.366856
										36.24	0.176187	0.166726	0.366607
										36.27	0.176311	0.166784	0.366391
										36.3	0.176437	0.166852	0.366151
										36.33	0.176614	0.166979	0.365936
										36.36	0.176785	0.167139	0.3657
										36.39	0.177027	0.167347	0.365473
										36.42	0.177269	0.167565	0.365157
										36.45	0.177511	0.167916	0.364888
										36.48	0.177749	0.168267	0.364637
										36.51	0.178118	0.168657	0.364386
										36.54	0.178469	0.169066	0.364109
										36.57	0.178794	0.169597	0.363861
										36.6	0.179118	0.170082	0.363576
										36.63	0.179553	0.170698	0.363311
										36.66	0.179899	0.171307	0.362976
										36.69	0.180336	0.171997	0.362682
										36.72	0.180738	0.172621	0.362398
										36.75	0.181204	0.17323	0.362112
										36.78	0.181641	0.173739	0.361786
										36.81	0.182076	0.174452	0.361466
										36.84	0.18252	0.175031	0.361143
										36.87	0.182993	0.175667	0.360821
										36.9	0.183425	0.176332	0.360453
										36.93	0.183842	0.177113	0.360171
										36.96	0.184252	0.1777	0.359809
										36.99	0.184804	0.178356	0.359461
										37.02	0.185239	0.178895	0.359082
										37.05	0.185668	0.179533	0.35877
										37.08	0.186101	0.180062	0.35848
										37.11	0.18663	0.18053	0.358199
										37.14	0.187094	0.180907	0.357766
										37.17	0.187505	0.181458	0.357383
										37.2	0.187916	0.181914	0.357027
										37.23	0.188369	0.182404	0.356659
										37.26	0.188741	0.182927	0.356223
										37.29	0.18914	0.183554	0.35591
										37.32	0.189486	0.184119	0.355475
										37.35	0.18986	0.184657	0.355125
										37.38	0.190164	0.185192	0.354675
										37.41	0.190475	0.185725	0.354271
										37.44	0.190775	0.18613	0.353891
										37.47	0.191085	0.186516	0.353567
										37.5	0.191316	0.186865	0.353141
										37.53	0.19153	0.187328	0.352802
										37.56	0.191711	0.18766	0.352439
										37.59	0.191918	0.187983	0.352036
										37.62	0.192087	0.188323	0.351584
										37.65	0.192207	0.188712	0.351303
										37.68	0.192313	0.188971	0.350902
										37.71	0.192417	0.189227	0.350557
										37.74	0.192445	0.189407	0.350138
										37.77	0.192476	0.189564	0.349765
										37.8	0.192489	0.189674	0.349409
										37.83	0.192472	0.18978	0.349126
										37.86	0.192416	0.189809	0.348682
										37.89	0.192391	0.189878	0.348343
										37.92	0.192398	0.189906	0.348006
										37.95	0.192336	0.189926	0.34769
										37.98	0.192249	0.189964	0.347296
										38.01	0.192158	0.189931	0.347038
										38.04	0.19207	0.189878	0.346654
										38.07	0.191902	0.189839	0.346332
										38.1	0.191778	0.189792	0.346014
										38.13	0.191582	0.189706	0.345725
										38.16	0.191421	0.189568	0.345403
										38.19	0.191239	0.189418	0.345089
										38.22	0.191067	0.189257	0.344689
										38.25	0.190913	0.189072	0.344408
										38.28	0.190778	0.188928	0.344134
										38.31	0.19057	0.188724	0.343869
										38.34	0.190388	0.188496	0.343543
										38.35	0.190198	0.188454	0.34349
										38.37	0.189978	0.188233	0.343255
										38.4	0.189701	0.187979	0.342966
										38.43	0.189487	0.187704	0.342705
										38.46	0.189223	0.187424	0.342403
										38.49	0.188994	0.187085	0.342127
										38.52	0.188729	0.186818	0.341851
										38.55	0.188472	0.186541	0.341617
										38.58	0.188181	0.186223	0.341314
										38.61	0.187943	0.185883	0.341058
										38.64	0.187716	0.185587	0.340804
										38.67	0.187496	0.1853	0.340545
										38.7	0.187265	0.184928	0.340249
										38.73	0.18702	0.184673	0.34003
										38.76	0.186735	0.184381	0.33976
										38.79	0.186473	0.184101	0.339484
										38.82	0.186265	0.183768	0.339201
										38.85	0.186034	0.183492	0.33898
										38.88	0.185761	0.183213	0.338754
										38.91	0.185568	0.182956	0.338543
										38.94	0.18539	0.182623	0.338229
										38.97	0.185261	0.182325	0.337963
										39	0.185078	0.182082	0.337724
										39.03	0.184895	0.181823	0.337507
										39.06	0.184762	0.18152	0.337243
										39.09	0.184636	0.181287	0.337034
										39.12	0.184473	0.181014	0.336821
										39.15	0.184332	0.180812	0.336604
										39.18	0.184189	0.180631	0.336363
										39.21	0.184024	0.180468	0.336166
										39.24	0.183891	0.180263	0.335954
										39.27	0.183792	0.180069	0.335729
										39.3	0.1837	0.179842	0.335465
										39.33	0.183611	0.179668	0.33523
										39.36	0.183469	0.179516	0.334998
										39.39	0.183404	0.179405	0.334768
										39.42	0.183339	0.179247	0.334507
										39.45	0.183232	0.179136	0.334277
										39.48	0.183124	0.179005	0.334043
										39.51	0.183044	0.178919	0.333818
										39.54	0.182971	0.178781	0.333554
										39.57	0.182933	0.17871	0.33329
										39.6	0.182884	0.178643	0.332992
										39.63	0.182827	0.178561	0.332754
										39.66	0.182785	0.17845	0.332456
										39.69	0.182731	0.178351	0.332253
										39.72	0.182714	0.178242	0.332037
										39.75	0.182683	0.17816	0.331824
										39.78	0.182643	0.17811	0.331577
										39.81	0.182627	0.178094	0.33137
										39.84	0.18256	0.17808	0.331102
										39.87	0.182545	0.178054	0.330911
										39.9	0.182512	0.178014	0.330649
										39.93	0.182465	0.178025	0.330425
										39.96	0.182432	0.178022	0.330227
										39.99	0.182386	0.17803	0.330029
										40.02	0.182366	0.178031	0.329745
										40.05	0.182326	0.178044	0.329507
										40.08	0.182301	0.178041	0.329315
										40.11	0.182233	0.178015	0.329132
										40.14	0.182171	0.177995	0.328959
										40.17	0.18209	0.177976	0.328782
										40.2	0.182052	0.177921	0.328566
										40.23	0.181986	0.177926	0.328394
										40.26	0.181914	0.177906	0.328169
										40.29	0.181842	0.177846	0.328008
										40.32	0.181753	0.177762	0.327846
										40.35	0.181696	0.177687	0.327695
										40.38	0.181618	0.17753	0.327473
										40.41	0.181459	0.177379	0.327295
										40.44	0.181383	0.177275	0.327113
										40.47	0.181297	0.177168	0.326924
										40.5	0.181213	0.177003	0.326671
										40.53	0.18112	0.176892	0.326464
										40.56	0.180996	0.176758	0.326253
										40.59	0.18083	0.17663	0.326063
										40.62	0.180688	0.176439	0.325788
										40.65	0.18057	0.176316	0.325578
										40.68	0.180461	0.176205	0.325382
										40.71	0.18034	0.176077	0.32518
										40.74	0.180221	0.175881	0.324908
										40.77	0.180056	0.175678	0.324683
										40.8	0.179912	0.175473	0.32444
										40.83	0.179773	0.175302	0.324192
										40.86	0.179612	0.175073	0.32394
										40.89	0.179501	0.174881	0.323739
										40.92	0.179432	0.174651	0.323477
										40.95	0.179283	0.174434	0.323239
										40.98	0.179141	0.174176	0.322961
										41.01	0.17898	0.174019	0.322714
										41.04	0.178826	0.173849	0.322483
										41.07	0.17868	0.17366	0.322322
										41.1	0.178586	0.173367	0.322014
										41.13	0.178467	0.173158	0.321788
										41.16	0.178332	0.172938	0.321581
										41.19	0.178174	0.172708	0.321359
										41.22	0.178024	0.17244	0.321093
										41.25	0.177869	0.17222	0.320825
										41.28	0.1778	0.171993	0.320501
										41.31	0.177692	0.171812	0.320248
										41.34	0.177551	0.171551	0.319975
										41.37	0.177535	0.171349	0.31971
										41.4	0.177387	0.171143	0.319465
										41.43	0.17723	0.170946	0.319218
										41.46	0.177093	0.170701	0.318898
										41.49	0.176977	0.170513	0.318653
										41.52	0.176812	0.170319	0.31839
										41.55	0.176697	0.170108	0.318107
										41.58	0.176597	0.169909	0.31779
										41.61	0.176484	0.169736	0.31761
										41.64	0.176363	0.169534	0.317373
										41.67	0.176237	0.169353	0.317154
										41.7	0.176085	0.169101	0.316905
										41.73	0.175977	0.168906	0.316653
										41.76	0.175819	0.168698	0.316424
										41.79	0.175703	0.168481	0.316215
										41.82	0.175579	0.168225	0.315977
										41.85	0.175488	0.167989	0.315756
										41.88	0.175364	0.167741	0.31553
										41.91	0.175276	0.167544	0.315259
										41.94	0.175134	0.167311	0.315067
										41.97	0.174985	0.167132	0.314831
										42	0.174779	0.166914	0.314586
										42.03	0.174668	0.166688	0.314309
										42.06	0.174584	0.166458	0.314095
										42.09	0.174487	0.166275	0.313835
										42.12	0.174333	0.16606	0.313604
										42.15	0.174215	0.165896	0.313273
										42.18	0.174104	0.165673	0.312989
										42.21	0.17402	0.165512	0.312745
										42.24	0.173869	0.165362	0.312507
										42.27	0.173752	0.165218	0.312215
										42.3	0.173633	0.165041	0.31198
										42.33	0.173523	0.164901	0.311688
										42.36	0.173398	0.164748	0.311416
										42.39	0.173335	0.164623	0.311107
										42.42	0.173207	0.164486	0.310876
										42.45	0.173087	0.164344	0.310642
										42.48	0.172966	0.164193	0.310415
										42.51	0.172884	0.164058	0.310151
										42.54	0.172744	0.163914	0.30993
										42.57	0.17265	0.163805	0.309739
										42.6	0.172502	0.163695	0.309559
										42.63	0.172395	0.163581	0.309305
										42.66	0.172316	0.163413	0.309119
										42.69	0.172209	0.163304	0.308915
										42.72	0.172096	0.163156	0.308744
										42.75	0.172037	0.163046	0.308501
										42.78	0.171963	0.162909	0.308268
										42.81	0.171863	0.162773	0.30805
										42.84	0.171709	0.16267	0.307861
										42.87	0.17156	0.162581	0.307633
										42.9	0.171471	0.162438	0.307395
										42.93	0.171407	0.16235	0.307181
										42.96	0.17133	0.162237	0.306958
										42.99	0.171269	0.162158	0.306693
										43.02	0.171195	0.162064	0.306476
										43.05	0.171125	0.162011	0.306217
										43.08	0.171057	0.161949	0.305948
										43.11	0.171048	0.161937	0.305637
										43.14	0.171032	0.161924	0.305384
										43.17	0.170999	0.161904	0.305124
										43.2	0.170974	0.161922	0.304909
										43.23	0.170966	0.161914	0.304583
										43.26	0.17097	0.161982	0.304286
										43.29	0.171016	0.162066	0.30399
										43.32	0.171007	0.162182	0.303715
										43.35	0.171054	0.162319	0.30342
										43.38	0.171047	0.162465	0.303174
										43.41	0.171087	0.162562	0.302881
										43.44	0.171182	0.162721	0.302581
										43.47	0.171295	0.162912	0.302289
										43.5	0.171397	0.163155	0.302036
										43.53	0.171488	0.163341	0.301765
										43.56	0.171622	0.163551	0.301555
										43.56	0.171748	0.163587	0.301488
										43.59	0.171871	0.163755	0.301164
										43.62	0.171997	0.164044	0.300873
										43.65	0.172133	0.164348	0.300626
										43.68	0.172301	0.164638	0.300392
										43.71	0.172531	0.164929	0.300087
										43.74	0.172745	0.165303	0.29985
										43.77	0.17302	0.165638	0.299591
										43.8	0.173207	0.166082	0.299344
										43.83	0.173446	0.166469	0.299038
										43.86	0.173722	0.166919	0.298802
										43.89	0.17404	0.167339	0.298578
										43.92	0.174288	0.167784	0.29835
										43.95	0.174568	0.168224	0.298041
										43.98	0.174855	0.168809	0.297792
										44.01	0.175253	0.169277	0.297562
										44.04	0.175589	0.169761	0.297316
										44.07	0.175876	0.170254	0.29703
										44.1	0.176199	0.170863	0.296804
										44.13	0.176572	0.171344	0.296538
										44.16	0.176907	0.171892	0.296286
										44.19	0.177245	0.172397	0.295971
										44.22	0.177548	0.172989	0.295705
										44.25	0.177932	0.173522	0.295459
										44.28	0.178244	0.174025	0.295174
										44.31	0.178542	0.17446	0.294792
										44.34	0.178861	0.175084	0.294485
										44.37	0.179192	0.175563	0.29418
										44.4	0.179472	0.176061	0.293935
										44.43	0.179764	0.17655	0.293624
										44.46	0.180078	0.177089	0.293375
										44.49	0.180369	0.177481	0.293055
										44.52	0.180657	0.177945	0.292755
										44.55	0.180937	0.178377	0.292433
										44.58	0.181196	0.178862	0.292178
										44.61	0.181521	0.179283	0.291899
										44.64	0.181757	0.179652	0.291682
										44.67	0.181966	0.179961	0.291362
										44.7	0.182182	0.180409	0.291159
										44.73	0.182401	0.180715	0.290944
										44.76	0.182609	0.181013	0.290701
										44.79	0.182814	0.181297	0.290394
										44.82	0.183009	0.1816	0.290145
										44.85	0.183199	0.181821	0.289885
										44.88	0.183345	0.182089	0.289679
										44.91	0.18348	0.182308	0.289426
										44.94	0.183573	0.18251	0.289169
										44.97	0.183692	0.182643	0.28889
										45	0.183736	0.182773	0.288678
										45.03	0.18378	0.182895	0.288313
										45.06	0.183802	0.183055	0.288054
										45.09	0.183872	0.183155	0.287776
										45.12	0.183926	0.183235	0.287476
										45.15	0.183968	0.183324	0.28713
										45.18	0.183969	0.183394	0.286877
										45.21	0.183925	0.183448	0.286546
										45.24	0.18391	0.183473	0.286274
										45.27	0.183902	0.183476	0.285904
										45.3	0.183886	0.183461	0.285597
										45.33	0.183812	0.183432	0.285324
										45.36	0.18376	0.183406	0.285089
										45.39	0.183722	0.183359	0.284747
										45.42	0.183634	0.183299	0.284488
										45.45	0.183588	0.183232	0.28419
										45.48	0.183511	0.183209	0.283902
										45.51	0.183408	0.183167	0.283606
										45.54	0.183328	0.183102	0.283355
										45.57	0.183238	0.182989	0.283097
										45.6	0.183182	0.18287	0.28282
										45.63	0.183098	0.182757	0.282545
										45.66	0.183011	0.182666	0.282276
										45.69	0.182955	0.182573	0.282014
										45.72	0.182879	0.182478	0.281764
										45.75	0.182799	0.182366	0.281386
										45.78	0.182683	0.182276	0.281133
										45.81	0.182552	0.182178	0.280892
										45.84	0.182477	0.182106	0.280586
										45.87	0.182442	0.181995	0.280244
										45.9	0.182385	0.181892	0.27996
										45.93	0.182258	0.181796	0.27964
										45.96	0.182161	0.181736	0.279352
										45.99	0.182058	0.181642	0.278993
										46.02	0.181972	0.181565	0.27867
										46.05	0.181891	0.181447	0.27836
										46.08	0.181835	0.181332	0.278083
										46.11	0.181763	0.181182	0.277663
										46.14	0.181709	0.181098	0.277344
										46.17	0.181625	0.181004	0.277011
										46.2	0.181596	0.18093	0.276708
										46.23	0.181573	0.180876	0.276371
										46.26	0.181589	0.180859	0.276096
										46.29	0.181657	0.180774	0.275755
										46.32	0.181706	0.180713	0.275389
										46.35	0.181751	0.180611	0.274958
										46.38	0.181742	0.180547	0.274625
										46.41	0.181688	0.180501	0.274305
										46.44	0.18165	0.180439	0.274005
										46.47	0.181625	0.180324	0.273525
										46.5	0.181623	0.180211	0.273189
										46.53	0.181614	0.18012	0.272836
										46.56	0.181599	0.180061	0.272517
										46.59	0.181546	0.180012	0.272199
										46.62	0.181539	0.179985	0.271916
										46.65	0.181513	0.179901	0.27159
										46.68	0.181514	0.179811	0.271273
										46.71	0.181484	0.179717	0.270935
										46.74	0.181434	0.17965	0.27066
										46.77	0.181413	0.179556	0.270402
										46.8	0.181333	0.179469	0.270145
										46.83	0.181213	0.179367	0.269825
										46.86	0.181062	0.179315	0.269572
										46.89	0.180915	0.179264	0.269333
										46.92	0.180796	0.179162	0.269086
										46.95	0.180729	0.179037	0.268806
										46.98	0.180675	0.178988	0.268556
										47.01	0.180642	0.178888	0.268275
										47.04	0.180575	0.178821	0.268027
										47.07	0.180501	0.178689	0.267686
										47.1	0.180426	0.178517	0.267369
										47.13	0.180343	0.178367	0.267044
										47.16	0.180257	0.178268	0.266764
										47.19	0.18019	0.178133	0.266393
										47.22	0.180101	0.178013	0.266107
										47.25	0.180014	0.177876	0.265819
										47.28	0.179961	0.177722	0.265493
										47.31	0.179878	0.177539	0.265139
										47.34	0.179746	0.177449	0.264922
										47.37	0.179576	0.177278	0.264595
										47.4	0.17946	0.177084	0.264312
										47.43	0.179372	0.17689	0.263974
										47.46	0.179279	0.176725	0.263672
										47.49	0.179164	0.176558	0.263431
										47.52	0.179076	0.176382	0.263197
										47.55	0.178911	0.176149	0.26285
										47.58	0.178786	0.175922	0.262616
										47.61	0.178649	0.17575	0.26238
										47.64	0.17848	0.175603	0.262164
										47.67	0.178347	0.175415	0.26185
										47.7	0.178237	0.175289	0.26159
										47.73	0.17811	0.17516	0.261287
										47.76	0.178027	0.175013	0.261007
										47.79	0.177915	0.174799	0.260718
										47.82	0.177764	0.174633	0.260484
										47.85	0.177578	0.174464	0.26022
										47.88	0.177478	0.174322	0.259949
										47.91	0.177353	0.174136	0.25954
										47.94	0.177218	0.174005	0.259233
										47.97	0.17708	0.173853	0.258969
										48	0.176922	0.173705	0.25869
										48.03	0.176795	0.173525	0.258328
										48.06	0.176681	0.173354	0.25805
										48.09	0.176518	0.173165	0.257726
										48.12	0.176346	0.172978	0.257441
										48.15	0.176192	0.172755	0.2571
										48.18	0.176073	0.172507	0.256796
										48.21	0.175959	0.172277	0.256475
										48.24	0.175854	0.172064	0.256197
										48.27	0.175684	0.171755	0.255809
										48.3	0.175527	0.171542	0.255547
										48.33	0.17539	0.171346	0.255245
										48.36	0.175262	0.171152	0.254932
										48.39	0.17514	0.170915	0.254579
										48.42	0.174977	0.170751	0.254354
										48.45	0.174815	0.170566	0.254045
										48.48	0.174725	0.170415	0.253726
										48.51	0.174662	0.170274	0.253447
										48.54	0.174591	0.170151	0.253143
										48.57	0.174514	0.17004	0.252863
										48.6	0.174425	0.169913	0.252558
										48.63	0.174356	0.169756	0.252188
										48.66	0.174288	0.169643	0.251886
										48.69	0.174188	0.169537	0.251615
										48.72	0.174081	0.169473	0.251292
										48.75	0.173997	0.169404	0.251088
										48.78	0.173928	0.169302	0.250812
										48.81	0.173889	0.169238	0.250536
										48.81	0.173822	0.169229	0.25049
										48.84	0.173755	0.169146	0.250214
										48.87	0.173675	0.169107	0.249932
										48.9	0.173591	0.169074	0.249657
										48.93	0.173521	0.169031	0.249435
										48.96	0.173449	0.168984	0.249049
										48.99	0.173335	0.168921	0.248755
										49.02	0.1732	0.168902	0.248475
										49.05	0.173128	0.168911	0.248202
										49.08	0.173072	0.168906	0.247824
										49.11	0.173077	0.168928	0.247539
										49.14	0.173063	0.168944	0.247232
										49.17	0.173066	0.168979	0.246956
										49.2	0.173069	0.169036	0.246646
										49.23	0.173074	0.169093	0.246367
										49.26	0.173091	0.169133	0.246064
										49.29	0.173121	0.169218	0.245803
										49.32	0.173138	0.169304	0.24544
										49.35	0.173184	0.169436	0.245133
										49.38	0.173228	0.169545	0.244827
										49.41	0.173332	0.169689	0.244541
										49.44	0.173425	0.169791	0.244187
										49.47	0.173517	0.169963	0.243961
										49.5	0.173591	0.170135	0.243707
										49.53	0.173663	0.17034	0.24347
										49.56	0.173752	0.170494	0.243141
										49.59	0.173809	0.170679	0.242846
										49.62	0.173943	0.170896	0.242558
										49.65	0.174035	0.171112	0.242319
										49.68	0.174145	0.171292	0.241975
										49.71	0.174249	0.171539	0.241704
										49.74	0.174381	0.171707	0.241426
										49.77	0.174488	0.171897	0.241163
										49.8	0.174623	0.172094	0.240878
										49.83	0.174753	0.172343	0.240728
										49.86	0.174921	0.172546	0.240404
										49.89	0.175067	0.172771	0.240115
										49.92	0.175152	0.172999	0.23978
										49.95	0.175235	0.173295	0.239501
										49.98	0.175406	0.173566	0.23922
										50.01	0.175523	0.173789	0.23905
										50.04	0.175639	0.173999	0.238639
										50.07	0.175744	0.174259	0.238391
										50.1	0.175853	0.174495	0.238145
										50.13	0.175965	0.1747	0.237888
										50.16	0.176165	0.174914	0.237585
										50.19	0.1764	0.175187	0.237348
										50.22	0.176597	0.175393	0.237092
										50.25	0.176719	0.17561	0.236873
										50.28	0.176822	0.175796	0.236625
										50.31	0.176929	0.176026	0.236396
										50.34	0.177044	0.176219	0.236176
										50.37	0.177116	0.176406	0.235981
										50.4	0.177172	0.176573	0.235686
										50.43	0.177175	0.176787	0.235443
										50.46	0.177255	0.17691	0.23522
										50.49	0.177336	0.177013	0.234976
										50.52	0.177408	0.177139	0.234688
										50.55	0.177452	0.177286	0.234487
										50.58	0.177473	0.177398	0.234227
										50.61	0.177488	0.177531	0.233994
										50.64	0.17752	0.177606	0.233665
										50.67	0.177528	0.177698	0.233408
										50.7	0.177458	0.177773	0.233178
										50.73	0.177357	0.177866	0.233008
										50.76	0.177278	0.177919	0.232676
										50.79	0.177258	0.177971	0.232471
										50.82	0.177222	0.178018	0.232219
										50.85	0.177171	0.178058	0.231969
										50.88	0.177112	0.178108	0.231681
										50.91	0.177093	0.17813	0.231443
										50.94	0.177057	0.17813	0.231171
										50.97	0.17705	0.17813	0.230907
										51	0.177014	0.178138	0.230634
										51.03	0.176973	0.178159	0.23042
										51.06	0.176877	0.178198	0.230222
										51.09	0.176844	0.178179	0.230052
										51.12	0.176785	0.178153	0.229722
										51.15	0.176712	0.178161	0.229479
										51.18	0.176647	0.178141	0.22924
										51.21	0.176576	0.178136	0.228991
										51.24	0.176502	0.178139	0.228705
										51.27	0.176448	0.178082	0.228574
										51.3	0.176393	0.178021	0.228315
										51.33	0.176355	0.177986	0.228072
										51.36	0.176283	0.177957	0.227793
										51.39	0.176229	0.177924	0.227524
										51.42	0.176164	0.177875	0.227274
										51.45	0.176121	0.177851	0.227128
										51.48	0.176057	0.177806	0.22678
										51.51	0.175989	0.177741	0.226563
										51.54	0.175952	0.177662	0.226345
										51.57	0.175891	0.177608	0.226123
										51.6	0.1758	0.177582	0.225856
										51.63	0.175708	0.177529	0.22569
										51.66	0.175607	0.17748	0.225471
										51.69	0.175526	0.17742	0.22528
										51.72	0.175449	0.177322	0.225062
										51.75	0.175374	0.177272	0.224851
										51.78	0.175286	0.177239	0.22464
										51.81	0.175202	0.177195	0.224487
										51.84	0.175185	0.177093	0.224267
										51.87	0.1751	0.176959	0.224056
										51.9	0.174981	0.17688	0.223842
										51.93	0.17487	0.176858	0.223633
										51.96	0.174834	0.176781	0.223395
										51.99	0.174753	0.176647	0.223223
										52.02	0.174684	0.176538	0.222973
										52.05	0.174583	0.176406	0.222744
										52.08	0.174477	0.176319	0.222476
										52.11	0.174359	0.176214	0.222255
										52.14	0.174284	0.17612	0.222025
										52.17	0.174177	0.176004	0.221812
										52.2	0.1741	0.175893	0.221524
										52.23	0.174026	0.175778	0.221316
										52.26	0.173971	0.175673	0.221115
										52.29	0.173824	0.175563	0.220915
										52.32	0.173721	0.175395	0.220687
										52.35	0.173655	0.17528	0.220507
										52.38	0.173629	0.175146	0.22029
										52.41	0.173537	0.175021	0.220092
										52.44	0.173427	0.174869	0.219845
										52.47	0.17333	0.174735	0.219613
										52.5	0.173253	0.174581	0.219405
										52.53	0.173152	0.174445	0.219209
										52.56	0.173027	0.174268	0.218974
										52.59	0.172934	0.174127	0.218836
										52.62	0.172864	0.173972	0.218691
										52.65	0.172769	0.173869	0.218539
										52.68	0.172702	0.173723	0.218357
										52.71	0.172597	0.173599	0.218215
										52.74	0.172484	0.173475	0.218051
										52.77	0.172368	0.173345	0.217841
										52.8	0.172309	0.173174	0.217623
										52.83	0.172234	0.173056	0.217438
										52.86	0.172152	0.172939	0.217293
										52.89	0.171951	0.172798	0.217159
										52.92	0.171839	0.172603	0.216948
										52.95	0.171758	0.172453	0.216754
										52.98	0.171671	0.172307	0.216575
										53.01	0.17153	0.172177	0.216393
										53.04	0.171421	0.172018	0.216217
										53.07	0.171277	0.171903	0.21606
										53.1	0.171177	0.171725	0.215864
										53.13	0.17107	0.171549	0.215675
										53.16	0.170969	0.171391	0.215471
										53.19	0.170861	0.171281	0.215319
										53.22	0.170767	0.171141	0.215152
										53.25	0.170686	0.171012	0.214967
										53.28	0.170608	0.170823	0.214755
										53.31	0.170526	0.170725	0.214612
										53.34	0.170414	0.17061	0.214451
										53.37	0.170289	0.170484	0.214279
										53.4	0.17021	0.170315	0.214048
										53.43	0.170157	0.170228	0.213854
										53.46	0.170095	0.170142	0.213662
										53.49	0.169992	0.17005	0.213513
										53.52	0.169918	0.169931	0.213351
										53.55	0.169841	0.169836	0.213208
										53.58	0.169756	0.16976	0.213056
										53.61	0.169649	0.169694	0.212932
										53.64	0.169584	0.169603	0.212712
										53.67	0.169481	0.169522	0.212574
										53.7	0.169426	0.169441	0.212444
										53.73	0.169402	0.169354	0.212286
										53.76	0.169345	0.169261	0.212109
										53.79	0.169254	0.169193	0.212007
										53.82	0.169153	0.169089	0.211843
										53.85	0.169083	0.169049	0.211708
										53.88	0.169053	0.168973	0.211516
										53.91	0.169014	0.168879	0.211371
										53.94	0.168937	0.168821	0.211256
										53.97	0.168844	0.168748	0.211158
										54	0.168737	0.168659	0.21101
										54.03	0.168649	0.168612	0.210911
										54.06	0.16863	0.168557	0.210844
										54.06	0.168579	0.168532	0.210841
										54.09	0.168515	0.168478	0.210837
										54.12	0.168492	0.168379	0.211059
										54.15	0.168511	0.168322	0.211471
										54.18	0.16849	0.168258	0.212183
										54.21	0.168465	0.168282	0.213095
										54.24	0.168415	0.168347	0.214316
										54.27	0.168367	0.168419	0.215398
										54.3	0.168371	0.168432	0.216425
										54.33	0.168395	0.168442	0.217274
										54.36	0.16843	0.16848	0.218333
										54.39	0.168455	0.168553	0.219073
										54.42	0.168454	0.168665	0.219718
										54.45	0.168461	0.168764	0.220261
										54.48	0.168509	0.168849	0.220777
										54.51	0.168534	0.168929	0.221083
										54.54	0.168564	0.169032	0.221334
										54.57	0.168595	0.169156	0.221485
										54.6	0.168612	0.169313	0.221511
										54.63	0.168662	0.169411	0.22135
										54.66	0.168763	0.169538	0.220945
										54.69	0.168796	0.16961	0.220306
										54.72	0.168827	0.169775	0.219071
										54.75	0.168908	0.169897	0.217847
										54.78	0.168974	0.170005	0.216532
										54.81	0.169047	0.170085	0.215207
										54.84	0.169088	0.170166	0.213743
										54.87	0.169116	0.17027	0.213017
										54.9	0.169129	0.170396	0.211645
										54.93	0.169177	0.17049	0.210655
										54.96	0.169256	0.170601	0.209661
										54.99	0.169315	0.170698	0.20889
										55.02	0.169335	0.170781	0.20824
										55.05	0.169377	0.170857	0.207713
										55.08	0.169437	0.170963	0.207068
										55.11	0.169534	0.171047	0.206599
										55.14	0.169604	0.171132	0.206214
										55.17	0.169659	0.171301	0.20588
										55.2	0.16969	0.171513	0.205568
										55.23	0.16973	0.171611	0.205344
										55.26	0.169777	0.171786	0.2051
										55.29	0.169839	0.171933	0.204858
										55.32	0.169898	0.172114	0.204674
										55.35	0.169961	0.172257	0.204522
										55.38	0.170005	0.17234	0.204358
										55.41	0.170054	0.172425	0.204144
										55.44	0.17012	0.172575	0.203917
										55.47	0.170158	0.172693	0.203731
										55.5	0.170207	0.172809	0.203541
										55.53	0.17025	0.172917	0.203297
										55.56	0.17029	0.173029	0.203105
										55.59	0.170349	0.173118	0.202887
										55.62	0.170396	0.173235	0.202691
										55.65	0.170443	0.173346	0.202501
										55.68	0.170485	0.173481	0.202315
										55.71	0.170568	0.173554	0.202111
										55.74	0.170583	0.173617	0.201929
										55.77	0.170569	0.173703	0.201726
										55.8	0.170553	0.173893	0.201542
										55.83	0.170575	0.174006	0.201346
										55.86	0.170595	0.174105	0.201132
										55.89	0.170591	0.174176	0.200894
										55.92	0.170591	0.17427	0.200735
										55.95	0.170583	0.174353	0.200519
										55.98	0.170595	0.174436	0.200365
										56.01	0.170606	0.174542	0.200177
										56.04	0.170584	0.174691	0.199979
										56.07	0.170552	0.174775	0.19979
										56.1	0.170492	0.174818	0.199646
										56.13	0.170484	0.174845	0.199443
										56.16	0.170461	0.174853	0.19924
										56.19	0.17042	0.174897	0.199075
										56.22	0.17043	0.174961	0.198942
										56.25	0.170482	0.175019	0.198764
										56.28	0.170475	0.175077	0.198616
										56.31	0.170463	0.175077	0.19842
										56.34	0.170449	0.174991	0.198203
										56.37	0.170452	0.174912	0.197987
										56.4	0.170455	0.174876	0.197817
										56.43	0.170449	0.174853	0.197673
										56.46	0.170442	0.17484	0.197531
										56.49	0.170417	0.174757	0.197301
										56.52	0.170396	0.174659	0.197091
										56.55	0.170352	0.174613	0.196938
										56.58	0.170342	0.174594	0.196796
										56.61	0.170338	0.174567	0.196611
										56.64	0.170321	0.174478	0.196459
										56.67	0.170274	0.174448	0.196277
										56.7	0.170205	0.174387	0.196106
										56.73	0.170136	0.174301	0.195907
										56.76	0.170074	0.174229	0.195754
										56.79	0.169976	0.174143	0.1956
										56.82	0.169866	0.174051	0.195447
										56.85	0.169771	0.173983	0.195254
										56.88	0.169727	0.173874	0.195134
										56.91	0.169668	0.173783	0.195024
										56.94	0.169615	0.173702	0.19488
										56.97	0.169547	0.173617	0.194693
										57	0.169484	0.173516	0.194574
										57.03	0.169382	0.173461	0.194455
										57.06	0.1693	0.173374	0.194354
										57.09	0.169292	0.173277	0.194194
										57.12	0.169216	0.173167	0.194077
										57.15	0.169116	0.173101	0.193938
										57.18	0.168995	0.17301	0.193853
										57.21	0.168869	0.172935	0.19372
										57.24	0.168753	0.172817	0.193584
										57.27	0.168688	0.172713	0.193467
										57.3	0.168598	0.172632	0.193369
										57.33	0.168554	0.172554	0.193262
										57.36	0.168485	0.172445	0.19319
										57.39	0.168437	0.172344	0.193064
										57.42	0.168442	0.172203	0.192953
										57.45	0.168404	0.172099	0.192861
										57.48	0.168348	0.171969	0.1928
										57.51	0.168301	0.171882	0.19272
										57.54	0.168257	0.171788	0.192626
										57.57	0.168239	0.17169	0.192479
										57.6	0.168201	0.171542	0.192356
										57.63	0.168122	0.171455	0.192232
										57.66	0.168019	0.171392	0.192149
										57.69	0.167947	0.171304	0.192097
										57.72	0.167896	0.171162	0.19202
										57.75	0.167894	0.171112	0.191912
										57.78	0.167841	0.171055	0.191821
										57.81	0.167796	0.170978	0.191706
										57.84	0.167769	0.170854	0.191595
										57.87	0.167707	0.170773	0.191516
										57.9	0.167539	0.170706	0.191449
										57.93	0.16737	0.170632	0.191349
										57.96	0.167234	0.170564	0.191253
										57.99	0.167097	0.170488	0.191137
										58.02	0.166937	0.170403	0.19103
										58.05	0.166862	0.170337	0.190916
										58.08	0.166824	0.170252	0.190851
										58.11	0.166762	0.170243	0.19077
										58.14	0.166607	0.170242	0.190663
										58.17	0.166505	0.170197	0.19054
										58.2	0.166374	0.17011	0.190446
										58.23	0.166258	0.170095	0.190358
										58.26	0.166136	0.170053	0.190262
										58.29	0.16601	0.170017	0.190154
										58.32	0.165885	0.169963	0.190098
										58.35	0.165814	0.169952	0.189997
										58.38	0.165723	0.169945	0.189883
										58.41	0.165636	0.169973	0.189763
										58.44	0.165533	0.170005	0.189645
										58.47	0.165449	0.170032	0.189533
										58.5	0.16535	0.170084	0.189425
										58.53	0.16526	0.170117	0.189338
										58.56	0.165121	0.170181	0.189251
										58.59	0.164975	0.170231	0.189169
										58.62	0.16479	0.170292	0.189102
										58.65	0.164628	0.170291	0.188962
										58.68	0.164485	0.170423	0.188849
										58.71	0.164301	0.170533	0.188759
										58.74	0.163999	0.170605	0.188712
										58.77	0.163743	0.170692	0.188647
										58.8	0.163499	0.170771	0.18856
										58.83	0.163236	0.170861	0.188465
										58.86	0.162865	0.170942	0.188351
										58.89	0.162525	0.171034	0.188274
										58.92	0.162083	0.17113	0.188199
										58.95	0.161644	0.171223	0.188116
										58.98	0.161147	0.171338	0.188068
										59.01	0.160725	0.171497	0.188025
										59.04	0.160299	0.171606	0.187966
										59.07	0.159908	0.171695	0.187867
										59.1	0.159393	0.171824	0.187783
										59.13	0.159044	0.171959	0.187697
										59.16	0.1587	0.172078	0.187658
										59.19	0.158379	0.172265	0.18761
										59.22	0.15807	0.172395	0.187539
										59.25	0.157834	0.172505	0.187436
										59.28	0.157602	0.172598	0.187359
										59.29	0.15742	0.172619	0.187353
										59.31	0.157196	0.172728	0.187304
										59.34	0.157069	0.172882	0.187223
										59.37	0.157016	0.173016	0.187173
										59.4	0.157029	0.173168	0.187125
										59.43	0.157079	0.173323	0.18703
										59.46	0.157106	0.173441	0.186941
										59.49	0.157157	0.173614	0.186848
										59.52	0.157226	0.17377	0.186762
										59.55	0.157318	0.173917	0.186672
										59.58	0.157387	0.17405	0.18657
										59.61	0.157431	0.174212	0.186476
										59.64	0.157505	0.174313	0.186412
										59.67	0.15759	0.174475	0.186338
										59.7	0.157691	0.174574	0.186252
										59.73	0.157809	0.174671	0.186158
										59.76	0.157933	0.174775	0.186115
										59.79	0.158057	0.174925	0.186074
										59.82	0.158144	0.17505	0.186007
										59.85	0.15828	0.175181	0.185894
										59.88	0.158397	0.175295	0.18584
										59.91	0.158464	0.175414	0.185774
										59.94	0.158502	0.175524	0.185733
										59.97	0.158571	0.175622	0.18571
										60	0.158653	0.175715	0.185683
										60.03	0.158779	0.175793	0.185663
										60.06	0.158858	0.175868	0.185607
										60.09	0.158931	0.17595	0.185548
										60.12	0.158977	0.176051	0.185533
										60.15	0.159071	0.176127	0.185523
										60.18	0.159165	0.176186	0.185496
										60.21	0.159256	0.176267	0.185481
										60.24	0.159241	0.176326	0.185496
										60.27	0.159187	0.176391	0.185507
										60.3	0.159156	0.176449	0.18549
										60.33	0.159165	0.176493	0.185443
										60.36	0.159147	0.176519	0.185386
										60.39	0.15908	0.176595	0.185364
										60.42	0.15908	0.176648	0.185406
										60.45	0.159128	0.176632	0.185405
										60.48	0.159175	0.17665	0.185372
										60.51	0.159195	0.176708	0.185316
										60.54	0.159185	0.176767	0.18528
										60.57	0.159156	0.176855	0.185282
										60.6	0.159161	0.176892	0.185293
										60.63	0.159191	0.176921	0.185277
										60.66	0.159229	0.176932	0.185235
										60.69	0.159246	0.176974	0.185186
										60.72	0.159238	0.177023	0.18518
										60.75	0.159236	0.177055	0.185174
										60.78	0.159269	0.177098	0.185163
										60.81	0.159292	0.177153	0.185143
										60.84	0.159304	0.17722	0.18512
										60.87	0.159322	0.177335	0.185107
										60.9	0.159318	0.177409	0.18509
										60.93	0.159323	0.177482	0.185039
										60.96	0.159348	0.177502	0.18504
										60.99	0.159342	0.177564	0.18504
										61.02	0.159333	0.177611	0.18507
										61.05	0.159323	0.177665	0.185059
										61.08	0.159325	0.177692	0.185048
										61.11	0.15931	0.177723	0.185037
										61.14	0.159314	0.177733	0.185034
										61.17	0.159332	0.17778	0.185053
										61.2	0.159348	0.17781	0.185049
										61.23	0.159415	0.177808	0.184996
										61.26	0.159492	0.177773	0.184963
										61.29	0.159516	0.177727	0.184946
										61.32	0.159525	0.177682	0.184925
										61.35	0.159528	0.177664	0.184918
										61.38	0.159555	0.177703	0.184858
										61.41	0.159574	0.177647	0.18476
										61.44	0.159586	0.17757	0.184703
										61.47	0.159584	0.17755	0.184653
										61.5	0.15959	0.177528	0.1846
										61.53	0.159603	0.177467	0.184553
										61.56	0.159688	0.177417	0.184488
										61.59	0.159733	0.177396	0.184412
										61.62	0.15979	0.177395	0.18435
										61.65	0.159818	0.177417	0.184297
										61.68	0.159869	0.177427	0.184232
										61.71	0.159894	0.177389	0.184151
										61.74	0.159907	0.177391	0.184062
										61.77	0.159904	0.1774	0.183932
										61.8	0.1599	0.177406	0.183879
										61.83	0.159929	0.177417	0.183822
										61.86	0.159971	0.177429	0.183732
										61.89	0.160023	0.177429	0.183618
										61.92	0.160119	0.177467	0.183519
										61.95	0.160141	0.177513	0.183434
										61.98	0.160164	0.17754	0.18331
										62.01	0.16021	0.177535	0.183164
										62.04	0.160245	0.177533	0.183031
										62.07	0.160263	0.177559	0.18287
										62.1	0.160292	0.177597	0.182711
										62.13	0.160333	0.177634	0.182638
										62.16	0.160375	0.177657	0.18249
										62.19	0.160407	0.177682	0.182348
										62.22	0.16043	0.1777	0.18218
										62.25	0.160459	0.177737	0.18203
										62.28	0.160511	0.177838	0.181854
										62.31	0.160555	0.17793	0.181724
										62.34	0.160562	0.177994	0.181528
										62.37	0.160571	0.178056	0.181363
										62.4	0.160588	0.17808	0.181256
										62.43	0.160633	0.178137	0.181137
										62.46	0.160663	0.178193	0.180944
										62.49	0.160692	0.178251	0.180801
										62.52	0.160706	0.178313	0.180665
										62.55	0.160721	0.178405	0.180524
										62.58	0.16075	0.178493	0.180386
										62.61	0.160766	0.178522	0.180276
										62.64	0.16077	0.178587	0.180104
										62.67	0.160804	0.178644	0.17995
										62.7	0.160849	0.178734	0.179831
										62.73	0.160913	0.178883	0.179716
										62.76	0.160936	0.179008	0.179615
										62.79	0.160982	0.17908	0.179516
										62.82	0.160999	0.179152	0.179358
										62.85	0.16103	0.179255	0.179275
										62.88	0.161066	0.179314	0.179146
										62.91	0.161109	0.179321	0.178995
										62.94	0.161113	0.179364	0.178817
										62.97	0.161152	0.17944	0.178651
										63	0.161213	0.179543	0.178524
										63.03	0.161222	0.17962	0.178379
										63.06	0.161254	0.179704	0.178213
										63.09	0.161302	0.179762	0.178099
										63.12	0.161348	0.17975	0.178022
										63.15	0.161421	0.179792	0.177958
										63.18	0.161455	0.179846	0.177813
										63.21	0.161465	0.179869	0.177661
										63.24	0.16148	0.179857	0.177463
										63.27	0.161513	0.179817	0.177287
										63.3	0.161493	0.179814	0.177054
										63.33	0.161478	0.179839	0.176859
										63.36	0.161507	0.179857	0.176666
										63.39	0.161568	0.179853	0.176515
										63.42	0.161628	0.179837	0.176259
										63.45	0.161657	0.179848	0.176055
										63.48	0.1617	0.179878	0.175873
										63.51	0.161739	0.179924	0.175708
										63.54	0.161804	0.179971	0.175486
										63.57	0.161908	0.179947	0.175304
										63.6	0.162024	0.179918	0.175054
										63.63	0.162099	0.179919	0.174824
										63.66	0.162133	0.179905	0.174583
										63.69	0.16215	0.179882	0.174395
										63.72	0.162159	0.179862	0.174205
										63.75	0.162145	0.179861	0.173998
										63.78	0.162174	0.179884	0.173767
										63.81	0.162204	0.179941	0.173613
										63.84	0.162248	0.179931	0.173465
										63.87	0.162271	0.179857	0.173269
										63.9	0.162295	0.179824	0.173085
										63.93	0.162329	0.179769	0.172973
										63.96	0.162265	0.179749	0.172834
										63.99	0.162183	0.179743	0.172676
										64.02	0.162126	0.179709	0.17249
										64.05	0.162055	0.179683	0.172318
										64.08	0.161993	0.179658	0.172133
										64.11	0.161777	0.17965	0.172055
										64.14	0.161652	0.179627	0.171813
										64.17	0.161589	0.179604	0.171616
										64.2	0.161509	0.1796	0.171398
										64.23	0.161413	0.17961	0.171187
										64.26	0.16135	0.179629	0.170986
										64.29	0.16126	0.179623	0.170816
										64.32	0.161183	0.179598	0.170629
										64.35	0.161111	0.179592	0.170456
										64.38	0.161077	0.179624	0.170217
										64.41	0.161011	0.179633	0.17001
										64.44	0.160934	0.179628	0.169834
										64.47	0.160893	0.179619	0.169676
										64.5	0.160868	0.179608	0.169453
										64.53	0.160816	0.179617	0.169284
										64.54	0.160781	0.179623	0.169254
										64.56	0.160693	0.179635	0.169115
										64.59	0.160638	0.179639	0.168915
										64.62	0.160586	0.179614	0.16869
										64.65	0.160539	0.179627	0.168501
										64.68	0.160524	0.179624	0.168305
										64.71	0.160517	0.179634	0.168113
										64.74	0.160507	0.179626	0.167901
										64.77	0.160488	0.179601	0.16768
										64.8	0.160435	0.179579	0.167466
										64.83	0.160381	0.179607	0.167251
										64.86	0.16031	0.179631	0.166935
										64.89	0.160274	0.179603	0.166697
										64.92	0.16023	0.179572	0.16647
										64.95	0.160203	0.179511	0.166229
										64.98	0.160205	0.179491	0.165956
										65.01	0.160214	0.179489	0.165775
										65.04	0.160209	0.179445	0.165517
										65.07	0.160225	0.179366	0.16533
										65.1	0.160259	0.179345	0.165066
										65.13	0.160237	0.17931	0.164809
										65.16	0.160167	0.17929	0.164554
										65.19	0.160106	0.179224	0.164295
										65.22	0.160049	0.179153	0.163953
										65.25	0.15999	0.179055	0.163698
										65.28	0.159901	0.178992	0.163462
										65.31	0.159859	0.178977	0.163212
										65.34	0.159832	0.178948	0.162926
										65.37	0.159728	0.178923	0.162716
										65.4	0.159571	0.178895	0.162463
										65.43	0.159465	0.178779	0.162218
										65.46	0.159333	0.178757	0.161937
										65.49	0.159208	0.178697	0.161727
										65.52	0.159017	0.178618	0.161483
										65.55	0.158818	0.178537	0.16127
										65.58	0.158655	0.178474	0.160914
										65.61	0.158527	0.178363	0.160645
										65.64	0.158363	0.178326	0.160394
										65.67	0.158238	0.17826	0.160165
										65.7	0.158107	0.178221	0.159904
										65.73	0.15801	0.178206	0.15972
										65.76	0.157859	0.178126	0.159499
										65.79	0.157752	0.178055	0.159336
										65.82	0.15765	0.177937	0.159129
										65.85	0.15756	0.177803	0.158908
										65.88	0.15744	0.177653	0.158652
										65.91	0.157293	0.17755	0.158435
										65.94	0.157125	0.177414	0.158152
										65.97	0.156997	0.177309	0.157918
										66	0.156897	0.177181	0.157689
										66.03	0.156786	0.17705	0.157439
										66.06	0.156644	0.17689	0.157165
										66.09	0.156491	0.176774	0.15696
										66.12	0.156311	0.176647	0.156713
										66.15	0.156166	0.176501	0.156441
										66.18	0.15602	0.176303	0.156149
										66.21	0.155905	0.17613	0.155916
										66.24	0.15572	0.175975	0.155644
										66.27	0.155587	0.175803	0.155426
										66.3	0.155408	0.175562	0.155067
										66.33	0.155273	0.175395	0.154786
										66.36	0.15509	0.175206	0.154518
										66.39	0.154947	0.175026	0.154229
										66.42	0.154786	0.174823	0.153913
										66.45	0.154635	0.17469	0.153718
										66.48	0.154489	0.174539	0.153401
										66.51	0.154369	0.174365	0.153126
										66.54	0.154218	0.174187	0.152796
										66.57	0.154119	0.173989	0.15253
										66.6	0.153884	0.17381	0.152295
										66.63	0.153786	0.1736	0.152052
										66.66	0.153658	0.173323	0.151678
										66.69	0.153477	0.173143	0.151378
										66.72	0.153274	0.172961	0.151085
										66.75	0.153124	0.172778	0.150782
										66.78	0.152959	0.172539	0.150463
										66.81	0.152798	0.172365	0.150206
										66.84	0.152579	0.172169	0.149883
										66.87	0.152377	0.17196	0.149602
										66.9	0.152178	0.171661	0.149304
										66.93	0.151969	0.171351	0.149063
										66.96	0.15165	0.171045	0.148792
										66.99	0.151346	0.170795	0.148622
										67.02	0.151038	0.170411	0.148228
										67.05	0.150752	0.170122	0.147997
										67.08	0.150472	0.169831	0.14775
										67.11	0.15032	0.169538	0.147508
										67.14	0.15011	0.169195	0.147226
										67.17	0.149868	0.169	0.147003
										67.2	0.149534	0.168675	0.146756
										67.23	0.149201	0.168323	0.146516
										67.26	0.148874	0.167981	0.146257
										67.29	0.148558	0.16769	0.146041
										67.32	0.148162	0.167393	0.145859
										67.35	0.147826	0.167123	0.1457
										67.38	0.147504	0.166755	0.145424
										67.41	0.147121	0.166435	0.145197
										67.44	0.146826	0.166151	0.145014
										67.47	0.146432	0.165879	0.144805
										67.5	0.146138	0.165588	0.144601
										67.53	0.145786	0.165366	0.144446
										67.56	0.145727	0.165073	0.144246
										67.59	0.145428	0.164816	0.144063
										67.62	0.145053	0.1645	0.143859
										67.65	0.144658	0.164231	0.143699
										67.68	0.14406	0.163963	0.143518
										67.71	0.143638	0.163778	0.143333
										67.74	0.143271	0.163356	0.143086
										67.77	0.142946	0.163083	0.142923
										67.8	0.142559	0.16283	0.142766
										67.83	0.142282	0.162612	0.142609
[truncated: 338 more rows]

## Sheet: Fig5
	Fig 5a					Fig 5b
		WT	Δψ				WT	Δψ
		559000000	1570				1345	2504
		1450000000	24300				1411	4730
		1600000000	35700				2652	6763
		1060000000	4040				2317	5468
		1850000000	17500				1150	2184
		1070000000					1292	4447
		207000000					2402	6634
		545000000					2266	5698
		97500000				Ave	1854.38	4803.5
		198000000				StDev	608.043	1720.22
		433000000
		177000000
	Ave	7.70542e+08	16622
	StDev	6.14119e+08	14217.6
	Fig 5c						Fig 5d
		No CHX		CHX			Please see the Supplementary Information.
		WT	Δψ	WT	Δψ
		368050	14741	7839	5144
		389347	10295	3600	5494
		343202	9293	3925	2148
	Ave	366866	11443	5121.33	4262
	StDev	23095.3	2899.76	2359.17	1839.12
	Fig 5e							Fig 5f
		WT	P38A	E45A					WT	P38A	E45A
		1.25033e+07	9.59567e+06	1.78772e+07					5.39725	7.47398	2.84725
		1.77718e+07	1.35126e+07	1.98474e+07					6.01916	7.07301	3.24433
		2.31957e+07	1.52894e+07	2.37911e+07					5.54209	8.04542	4.10021
		2.21825e+07	1.48578e+07	2.55112e+07					5.91188	7.47701	2.82028
		2.39075e+07	1.61621e+07	2.89405e+07					4.79269	9.33962	4.30573
		2.7387e+07	1.85085e+07	2.93393e+07					8.10685	10.9076	4.59288
	Ave	2.1158e+07	1.46544e+07	2.42178e+07					7.92997	14.4635	6.57321
	StDev	5.25227e+06	2.98216e+06	4.68383e+06					5.24254	12.5885	6.56691
									5.96848	17.3824	6.35103
									6.06037	5.94485	2.72344
									9.20162	8.74505	3.0202
									12.445	9.03371	3.32994
								Ave	6.88483	9.87288	4.20628
								StDev	2.19864	3.38815	1.50793
								Note: this is a combined version of the measurements in Supp Fig 3

## Sheet: FigS1
	Fig S1a
		IIIB RT (DD>AA)	IIIB ΔEnv		RT (WT)	RT (D110E)	RT (WT)	RT (D110E)
		1.2	223000		2770000	2350	4450000	998
		1.02	243000		2490000	2800	4320000	1270
			638000		6430000
			694000		5370000
	Ave	1.11	449500		4265000	2575	4385000	1134
	StDev	0.127279	251169		1.94027e+06	318.198	91923.9	192.333
	Fig S1b
		100 µM			Ave	StDev
	NVP	188187	176591	166259	177012	10970.1
	NVP +CHX	17527	14415	19164	17035.3	2412.37
	TAF	175325	224787	243791	214634	35344.1
	TAF +CHX	16846	19518	18995	18453	1416.06
	EFV	19934	19810	19895	19879.7	63.4061
	EFV +CHX	13740	13466	13986	13730.7	260.126
		10 µM			Ave	StDev
	NVP	330914	384909	391864	369229	33363.5
	NVP +CHX	18377	14667	16215	16419.7	1863.45
	TAF	228438	236127	178621	214395	31219.1
	TAF +CHX	18440	17510	16064	17338	1197.3
	EFV	212989	526082	465221	401431	166008
	EFV +CHX	13441	17298	16995	15911.3	2144.73
		1 µM			Ave	StDev
	NVP	212213	440006	452438	368219	135248
	NVP +CHX	14768	17718	17312	16599.3	1598.92
	TAF	248569	181564	182533	204222	38408.7
	TAF +CHX	18442	16993	17996	17810.3	742.128
	EFV	188715	483100	340270	337362	147214
	EFV +CHX	20140	18291	16790	18407	1678.01
	Fig S1c
		No RTI	NVP	TAF	EFV	Ctrl (GFP)
		275039	196670	158419	65	140
		312183	192794	123917	55	180
		287657	158587	74762	120	151
	Ave	291626	182684	119033	80	157
	StDev	18887.5	20958.1	42041.8	35	20.664

## Sheet: FigS2
	Fig S2a
		Early RT
			24h		Ave	48h		Ave
		No virus	0.146	0.1373	0.14165	0.24318	0.21403	0.228605
		Virus	7.00678	8.25079	7.62879	4.12256	5.12531	4.62393
		NVP	1.78403	1.74682	1.76543	0.66721	0.58086	0.624035
		Late RT
			24h		Ave	48h		Ave
		No virus	0.09512	0.12202	0.10857	0.1761	0.11992	0.14801
		Virus	3.81245	3.35238	3.58242	4.09054	2.38256	3.23655
		NVP	0.35591	0.39297	0.37444	0.32575	0.33321	0.32948
		2-LTR
			24h		Ave	48h		Ave
		No virus			nd			nd
		Virus	0.02438	0.02505	0.024715	0.03251	0.03677	0.03464
		NVP			nd			nd
			nd = not detected

## Sheet: FigS3
	Fig S3a
		Equal packaged Nluc
			No CHX			Ave	StDev			CHX			Ave	StDev
		WT	95913	63052	73663	77542.7	16770.5		WT	12095	12027	12342	12154.7	165.76
		P38A	206220	178253	237148	207207	29459.9		P38A	14258	14160	13643	14020.3	330.434
		E45A	76992	90144	89359	85498.3	7377.15		E45A	11713	13727	14070	13170	1273.4
		Equal p24
			No CHX			Ave	StDev			CHX			Ave	StDev
		WT	54679	57196	71697	61190.7	9185.37		WT	9249	11934	8844	10009	1679.35
		P38A	212018	267907	292105	257343	41075.2		P38A	28356	28685	26780	27940.3	1018.25
		E45A	74055	100853	99886	91598	15200.4		E45A	26258	23423	21748	23809.7	2279.73
		Equal volume
			No CHX			Ave	StDev			CHX			Ave	StDev
		WT	74061	81662	74397	76706.7	4294.73		WT	13722	13567	13424	13571	149.04
		P38A	428401	432182	457680	439421	15925.4		P38A	57319	61103	56887	58436.3	2319.48
		E45A	211827	205032	198241	205033	6793		E45A	74397	63197	48349	61981	13066.5
		Equal vRNA
			No CHX			Ave	StDev			CHX			Ave	StDev
		WT	59834	74892	75367	70031	8834.05		WT	9873	8139	6056	8022.67	1911.16
		P38A	286530	394297	388332	356386	60570.8		P38A	48198	45088	42987	45424.3	2621.73
		E45A	134745	138887	153883	142505	10068.9		E45A	49476	45986	46212	47224.7	1952.98
	Fig S3b
				No CHX/CHX
		Equal packaged Nluc				Ave	StDev
		WT	7.92997	5.24254	5.96848	6.38033	1.39025
		P38A	14.4635	12.5885	17.3824	14.8114	2.41582
		E45A	6.57321	6.56691	6.35103	6.49705	0.126496
		Equal p24				Ave	StDev
		WT	5.91188	4.79269	8.10685	6.27048	1.68593
		P38A	7.47701	9.33962	10.9076	9.2414	1.71739
		E45A	2.82028	4.30573	4.59288	3.9063	0.951411
		Equal volume				Ave	StDev
		WT	5.39725	6.01916	5.54209	5.65283	0.325413
		P38A	7.47398	7.07301	8.04542	7.5308	0.488692
		E45A	2.84725	3.24433	4.10021	3.39726	0.640325
		Equal vRNA				Ave	StDev
		WT	6.06037	9.20162	12.445	9.23567	3.19246
		P38A	5.94485	8.74505	9.03371	7.90787	1.70614
		E45A	2.72344	3.0202	3.32994	3.02453	0.30327
